1 **Title page**

2 **1. Title:**

3 **Understanding *Wolbachia* acquisition and co-divergence of hosts and their**  
 4 **associated bacteria: *Wolbachia* infection in the *Chorthippus parallelus* hybrid zone**

5 **2. Author's names with initials:**

6 Martinez-Rodriguez, P<sup>1, 2</sup>; Arroyo-Yebras, F<sup>2</sup>; Bella, J.L<sup>2</sup>.

7 **3. Full postal addresses**

8 **1.** INRA, Univ. Nice Sophia Antipolis, CNRS, UMR 1355-7254 Institut Sophia  
 9 Agrobiotech, 06900 Sophia Antipolis, France

10 **2.** Departamento de Biología, Universidad Autónoma de Madrid, C/ Darwin, 2, 28049  
 11 Madrid, Spain.

12 **4. Keywords:** *Wolbachia*, Codivergence, *Chorthippus parallelus*, hybrid zones.

13 **5. Name, address, fax number and electronic mail address of corresponding author:**

14 **Name** Martinez-Rodriguez, Paloma

15 **Address** BPI - Biologie des Populations Introduites.

16 INRA, Univ. Nice Sophia Antipolis, CNRS, UMR 1355-7254 Institut Sophia  
 17 Agrobiotech, 06900 Sophia Antipolis, France

18 **Electronic mail address:** pamartinez@paca.inra.fr

19 **5. Running title:** co-divergence of *C. parallelus* and *Wolbachia*

20

## 21 Abstract

22       *Wolbachia* is one of the best known bacterial endosymbionts affecting insects and  
 23 nematodes. It is estimated that it infects 40% of insect species, so epidemiologically it may be  
 24 considered a pandemic species. However, the mechanisms by which it is acquired from other  
 25 species (horizontal transmission) or by which it coevolves with its hosts as a result of vertical  
 26 transmission across generations are not known in detail. In fact, there are few systems in  
 27 which the codivergence between host and bacterium has been described.

28       This study goes in deep in the *Wolbachia* infection in the grasshopper *Chorthippus*  
 29 *parallelus*. This well-known system allows us to investigate the mechanism of acquisition of  
 30 various *Wolbachia* strains in a new host, and the bacterial genomic changes during bacterial-  
 31 host codivergence: We describe the genetic diversity of *Wolbachia* strains infecting both  
 32 subspecies of *C. parallelus* and analyse their phylogenetic relationship. We also show the  
 33 emergence of new bacterial alleles resulting from recombination events in *Wolbachia* infecting  
 34 hybrid hosts. Our data suggest that F strains detected in this grasshopper have co-diverged  
 35 with its host, *versus* a more recent horizontal transmission of B strains. According with this, we  
 36 discuss the potential role of *Wolbachia* in the dynamics of the grasshopper hybrid zone and in  
 37 the divergence of the two grasshopper subspecies since the origin of their hybrid zone.

## 38 Introduction

39 *Wolbachia* is one of the most widely distributed endosymbiotic bacteria, infecting  
 40 about 40% of insect species. At least, 8 bacterial supergroups have been described (Zug &  
 41 Hammerstein 2012, but see Gerth et al. 2014). Vertical (from females to offspring) and  
 42 horizontal (across species) transmission are the two main mechanisms to explain *Wolbachia*  
 43 expansion. However, the way in which the two main modes of transmission have combined  
 44 during the evolutionary history of *Wolbachia* and its hosts it is not well understood (Kremer &  
 45 Huigens 2011; Werren et al., 2008). On the one hand, horizontal transmission has been  
 46 proposed as an essential mechanism to explain the current distribution of *Wolbachia* across  
 47 species. Actually, horizontal transmission and infection loss could explain the observed  
 48 phylogenetic incongruence between *Wolbachia* and its hosts or the appearance of the same  
 49 *Wolbachia* strain in distantly related host species (Baudry et al. 2003; Keller et al. 2004;  
 50 Martins et al. 2012; Raychoudhury et al. 2009; Shoemaker et al. 2003; Yun et al. 2011). On the  
 51 other hand, vertical transmission is the predominant mode of transmission (Moran et al. 2008;  
 52 Saridaki & Bourtzis 2010). Due to that, coevolution between *Wolbachia* and their host should  
 53 be common (but it has been rarely described) (Raychoudhury et al. 2009; but see Bordenstein  
 54 et al. 2009 and Gerth et al. 2014). Here, the *C. parallelus* hybrid zone was used to investigate  
 55 this infrequently reported process due to the knowledge about the evolutionary history of this  
 56 species.

57 The hybrid zone formed by the meadow grasshopper *Chorthippus parallelus* is  
 58 considered an example of secondary contact after allopatric differentiation (Bella et al. 2007;  
 59 Hewitt 1993; Shuker et al. 2005). After the last ice age, *C. p. parallelus* and *C. p. erythropus* met  
 60 at the geographical barrier of the Pyrenees, giving rise to the hybrid zone that exists to this  
 61 day. Currently, the hybrid zone along the valleys of Tena (Spain) and d'Ossau (France) extends  
 62 over more than 40 km, where a gradient of phenotypic and genotypic characters have been

found between pure populations, located at the ends of the hybrid zone (Hewitt 2001; Hewitt 2011; Shucker *et al.* 2005).

B and F *Wolbachia* supergroups infect *C. parallelus* (Dillon *et al.*, 2008 ; Martínez *et al.* 2009; Zabal-Aguirre *et al.* 2010). Previous data provide evidence of different patterns of infection and coinfection by the two bacterial supergroups in pure and hybrid populations throughout the Iberian Peninsula, the Pyrenees and the rest of Europe, based on infection frequencies (Bella *et al.* 2010; Martinez-Rodriguez 2013; Zabal-Aguirre *et al.* 2010). It is noteworthy that these bacterial biogeographical patterns clearly delineate the current distribution of pure and hybrid grasshoppers.

Experimental crosses in the field with pure and hybrid individuals of *C. parallelus* show that *Wolbachia* causes cytoplasmic incompatibility in crosses between infected and uninfected individuals (unidirectional incompatibility) and in those between individuals infected with different bacterial lineages (bidirectional cytoplasmic incompatibilities), as indicated by the significant reduction in the number of offspring of the affected crosses. *Wolbachia* also increases the fecundity of infected females (Zabal-Aguirre *et al.* 2014). In addition, the bacterium induces certain cytogenetic effects in this grasshopper, this affecting the proportion of abnormal spermatids and the chiasmata frequency (Sarasa *et al.* 2013). The existence of CI and other mentioned effects suggest that *Wolbachia* infection could influence the dynamics of the *Chorthippus* hybrid zone, reinforcing the reproductive barrier between them. Actually, several theoretical studies support this fact: For example, recently Telschow *et al.* (2014) report that nuclear incompatibilities (according with Dobzhansky Muller model) and cytoplasmic incompatibilities could act synergistically in order to keep the existence of genetic diversity after secondary contact. However, more studies are required to understand the underlying processes in this particular case.

87           In this study and based on the multilocus system typing (MLST system) proposed by  
 88   Baldo *et al.* (2006b), we (1) analyse the phylogenetic relationship between *Wolbachia* strains  
 89   infecting host populations and (2) the current distribution of *Wolbachia* infection in pure and  
 90   hybrid populations of this grasshopper inside and outside its hybrid zone, including  
 91   populations outside the Iberian peninsula. This also serves to propose the possible influence of  
 92   ancestral *Wolbachia* in the very origin of this hybrid zone. Besides we (3) describe the greater  
 93   genetic variability in *Wolbachia* strains infecting grasshopper hybrid populations vs. pure  
 94   subspecies populations, which suggests close endosymbiont/host-genotype interactions and  
 95   provides evidence of coupled evolution between both genomes. Finally, we infer (4) the  
 96   modes of acquisition of *Wolbachia* in *C. parallelus* and describe (5) how the combination of  
 97   vertical and horizontal modes of transmission explains current patterns of *Wolbachia* infection  
 98   in *C. parallelus* and its consequences for the evolutionary history of the host.

## Material and methods

### *Field collections*

*Wolbachia* infection was analyzed in more than 1780 *Chorthippus parallelus* individuals collected from 21 European locations inside and outside of the hybrid zone in 2008 and 2009, with the exception of Bubion and Epping Forest populations, captured in 2002 and 2004, in the context of a *Wolbachia* infection prevalence experiment in *Chorthippus* (see Martínez-Rodríguez, 2013). The populations are grouped as indicated in Table 1. Complete data collection are indicated in supplementary table 1. Gonads were dissected and fixed in 100% ethanol.

### *DNA extraction, Wolbachia detection and sequencing*

DNA was extracted from whole fixed ovaries and testes, as described in Martínez-Rodríguez *et al.* 2013a and 2003b. *Wolbachia* was detected by PCR amplification of a *Wolbachia* 16S rRNA gene in all sampled individual, using *Wolbachia*-specific primers (Zabal-Aguirre *et al.* 2010), followed by a second, nested PCR amplification using strain-specific primers (Martínez-Rodríguez *et al.* 2013a and 2013b) (Table 2). PCR and Nested-PCR reactions were adjusted to 25 µl: 1X buffer, 2 mM of Mg<sub>2</sub>Cl, 0.2 mM dNTP, 1.2 µM each primer, 1.25 units of BioTaq DNA polymerase (Bioline) and 100 ng genomic DNA (for the first PCR) or 0,5 µl of previous PCR product in the nested PCR). The reaction was initiated with a cycle of 95° C 30s, followed by 35 cycles of 30s at 95° C, 1 min at 54°C (first PCR) or 69° C (nested-PCR), 1min 30s at 72° C and a final cycle of 10 min at 72° C. A total of 10 µl of each amplification product were electrophoretically separated on 1% agarose gels, which were stained with 0.5 mg/ml ethidium bromide and visualized under UV light (UVIdoc, Uvitec Cambridge).

We characterized the *Wolbachia* strains using the MLST and *wsp* (*Wolbachia* surface protein) gene characterisation systems (Baldo *et al.* 2006b). The *gatB*, *coxA*, *hcpA*, *ftsZ*, *fbpA*

and *wsp* genes were amplified in 127 selected singly infected individuals (individuals infected exclusively by F or B supergroup, according with the previous *16S rRNA* gene test, supplementary table 1) while multiple-infected individuals were discarded to avoid ambiguous chromatogram lectures and to reduce the experimental workload. Infection frequencies according with 16S gene test in the different populations are described in Martinez-Rodriguez, 2013 and supplemental table 1). These genes were amplified using previously described methods (Baldo *et al.* 2006b) with slight modifications: PCR reactions were performed in 50 µl volumes containing 2 mM of MgCl<sub>2</sub>, 0.2 mM of dNTP, 30 pmoles of each primer, 1.25 U of *Taq* BIOTAQ™ DNA polymerase (Bioline) and 2 µl of DNA solution (50 ng/µl). The reaction was initiated with a cycle of 95° C 30s, followed by 35 cycles of 30s at 95° C, 1 min at 54°C (*hcpa*, *gatb*, *ftsZ* and *coxA* genes) or 59° C (*wsp* and *fbpA*), 1min 30s at 72° C and a final cycle of 10 min at 72° C. A total of 10 µl of each amplification product were electrophoretically separated on 2% agarose gels, which were stained and visualized as described above. Amplified genes were purified by ExoSAP-IT (GE Healthcare) and Sanger automatically sequenced (by Stabvida, Portugal). The MLST and *wsp* sequences generated in this study have been deposited in the GenBank database under accession numbers KM078849-KM078883 (see supplementary table 2).

### *Sequences analyses*

Further studies in this grasshopper confirm *Wolbachia* integrations in the host genome. Current genomic data confirm the absence of integrated sequences of *ftsZ*, *fbpA* and *wsp* genes. However, some incomplete reads that mapped to *coxA*, *gatB* and *hcpA* have been detected in uninfected individuals in low coverage (Funkhouser-Jones *et al.*, 2015). This forces to be cautious before confirming that the sequences obtained by PCR belong to infecting bacteria and an accurate protocol was developed to ensure this, as indicated below.

Firstly, DNA was extracted from gonad tissue in order to increase the living bacteria/nuclear insertions ratio. Previous studies confirm the massive presence of *Wolbachia* in the grasshopper gonads of infected individuals (Martinez *et al.*, 2009). This reduces the probability of Sanger sequencing *Wolbachia* insertions. Secondly, to distinguish the sequences belonging to infecting *Wolbachia* and those sequences integrated into the host nucleus all sequences were compared with the standard sequences to detect possible rearrangements and also translated into protein, in order to detect frameshift mutations, stop codons, and indels. Previous studies in a different grasshopper, *Podisma pedestris*, confirm that most *Wolbachia* insertions show these types of mutations, due to the absence of evolutionary constraints after integration (non-translated sequences) (Martinez-Rodriguez *et al.* unpublished data). Although this reduces the probability of considering an integrated sequence as belonging to “living *Wolbachia*”, we are reminded that it cannot totally discard this possibility. We are taking this in mind when describing and discussing our results, mainly those regarding recombinant and new alleles (see below).

### *Phylogenetics analysis*

Bayesian likelihood was inferred using a Markov Chain-Monte Carlo variant run in the MrBayes 3.2.1 program (Ronquist & Huelsenbeck 2003). Phylogenies based on single and concatenated MLST genes and *wsp* were reconstructed. JModeltest (Posada 2008) was used to distinguish the appropriate model of evolution, the best likelihood score being chosen on the basis of the AIC criteria (Akaike 1974). The selected models were GTR+I+G for concatenated MLST, *ftsZ* and *gatB*; GTR+G (general time-reversible model, including gamma correction) for *coxA*, *hcpA* and *wsp*; and HKY+I+G (the Hasegawa, Kishino and Yano model (Hasegawa *et al.*, 1985), including gamma and proportion invariant corrections) for the *16S rRNA* gene. Bayesian analysis was carried out for 10<sup>6</sup> generations with a sample frequency of 100. The first 25% of trees were considered as burn-in and thus discarded. For each locus, the level of nucleotide diversity per site and the number of variable sites or Ka/Ks were estimated using DnaSP



software (Librado & Rozas 2009). Alignments of individual and concatenated genes with and without outgroups were screened for significant levels of recombination using RDP4 v4.16 (Martin *et al.* 2010). The analysis involved several tests including GENECONV (Padidam *et al.* 1999), MAXCHI (Maynard Smith 1992) and Chimaera (Posada & Crandall 2001). A Bonferroni correction was applied and significance was concluded for values of  $p < 0.01$ .

### *Strain characterisation*

Following the MLST system (Baldo *et al.* 2006b; Maiden *et al.* 1998), we defined a *Wolbachia* strain or sequence type (ST) as being different on the basis of its unique combination of five alleles. Furthermore, strains sharing at least three alleles were considered to belong to an ST complex, a group of evolutionarily related haplotypes. This analysis was carried out using START2 (Jolley *et al.* 2001). The *wsp* system was employed as a complementary approach for strain characterisation (see Baldo *et al.* 2005, Baldo *et al.* 2006a). Alleles that were detected only once were excluded in the analysis to avoid the miss interpretation of the PCR-associated sequencing errors.

### *Inference of bacterial microevolution using multilocus sequence data*

We inferred *Wolbachia* microevolution using ClonalFrame to identify the clonal relationships between strains, and to estimate recombination events that have disrupted the clonal inheritance (Didelot & Falush 2007). We performed five separate runs, executing 250,000 MCMC iterations for each, discarding the first 100,000 iterations as burn-in.

### *Biogeographical analysis*

An AMOVA based on the ST frequencies detected in each population was carried out based on the estimated supergroup frequencies (some data here used from Bella *et al.* 2010 and Zabal-Aguirre *et al.* 2010) and the genetic distance between haplotypes (calculated as the Tamura–Nei distance). Locus-by-locus AMOVA and an exact test of population differentiation

were also carried out. In addition, we tested the correlation between genetic and geographical distances with Mantel tests. Geographical distance was estimated using Geographical Distance Matrix Generator v.1.2.3 (<http://biodiversityinformatics.amnh.org>). All analyses were done using Arlequin 3.11 (Excoffier *et al.* 2005).

## Results

### 1. *Wolbachia* diversity in *C. parallelus*

#### 1.1. How many *Wolbachia* strains infect *C. parallelus*?

To characterize the *Wolbachia* diversity across the hybrid zone, *16S rRNA*, MLST and *wsp* genes of *Wolbachia* were sequenced from host grasshopper individuals collected in several populations, inside and outside the hybrid zone.

The reanalysed phylogenetic tree based on *Wolbachia 16S rRNA* gene sequences confirmed that *C. parallelus* are infected by at least 4 strains belonging to the F supergroup and 2 B supergroup's strains (Bella *et al.* 2010; Martínez-Rodríguez *et al.* 2013a; Zabal-Aguirre *et al.* 2010) (see supplementary Fig. 1).

In addition, we studied *Wolbachia* supergroups and strains infecting *C. parallelus*, on the basis of the five genes involved in the MLST system, and on the *wsp* gene (Baldo *et al.*, 2006b). The analysis of the sequences of the 5 MLST genes distinguish 33 different haplotypes or ST (sequence types, according with Baldo *et al.* 2006b) based on the combination of 5 loci alleles: We detected 5 different alleles of *ftsZ* gene, 5 alleles of *gatB* gene, 6 alleles of *coxA* gene, 5 alleles of *fbpA* gene, and 10 alleles of *hcpA* gene (see Fig. 1, 2 and supplemental Figs. S2 to S6). Nucleotide diversity and other characteristics are summarised in supplemental Table 3. The patterns of ST distribution across geographical areas will be describe after (Fig. 3 and S7-S12).

## 1.2. *Bacterial recombination*

Recombination was detected in 19 STs or haplotypes. Recombinant *Wolbachia* strains were detected by two methods. Firstly, RDP4 analysis detected recombinant strains under several tests (marked “R” in Fig. 4, in contrast with parental strains, which are indicated as “F” or “B”, depending on the supergroup). In addition, the appearance of alleles of the B supergroup in isolates of the F supergroup (based on most of the genetic markers), and *vice versa*, also indicates recombination events. Our analysis revealed that both supergroups have exchanged parts of their genomes in some populations of *C. parallelus*, such as those of Portalet or Tourmont, in the centre of the hybrid zone, while recombination has not been detected in the grasshopper’s pure populations within or outside the hybrid zone. Some recombinants have also been detected in the north of Spain, in populations of this grasshopper characterised as hybrid on the basis of chromosomal markers (Bella *et al.* 2007).

## 1.3. *Wolbachia phylogeny*

After discarding recombinants STs to avoid artefacts, the phylogenetic tree from concatenated sequences allows distinguish 10 different strains of *Wolbachia* belonging to B supergroup and 4 different strains to F supergroup (Fig. 2).

In general, *Wolbachia* strains in *C. parallelus* are highly related. On the one hand, F strains are highly related between them. Other F strains, like *Wolbachia* infecting *Opisthophthalmus granifrons* (Scorpionida) or *Cimex lectularius* (Hemiptera) are more distant. Their host is not related with *Chorthippus* (ecologically or phylogenetically). B strains are also related between them, but also with the *Wolbachia* strains infecting other Orthopteran, like *Teleogryllus taiwanemma*, and the recently detected *Wolbachia* strain infecting *Podisma pedestris*. This latest species shares habitat with *C. parallelus* (data not shown). Also, B strains (based on 16S rRNA gene amplification) have been recently detected in other species,

244 including *Ruspolia nitidula*, *Chorthippus vagans* and *Euhorthippus chopardi*, captured in the  
245 same populations that *Chorthippus parallelus* (Martinez-Rodriguez 2013).

246 Phylogenetic analyses of individual genes were also carried out. Alleles were correctly  
247 characterised as belonging to the F or B supergroups (Fig. 1 and Figs. S2-S6).

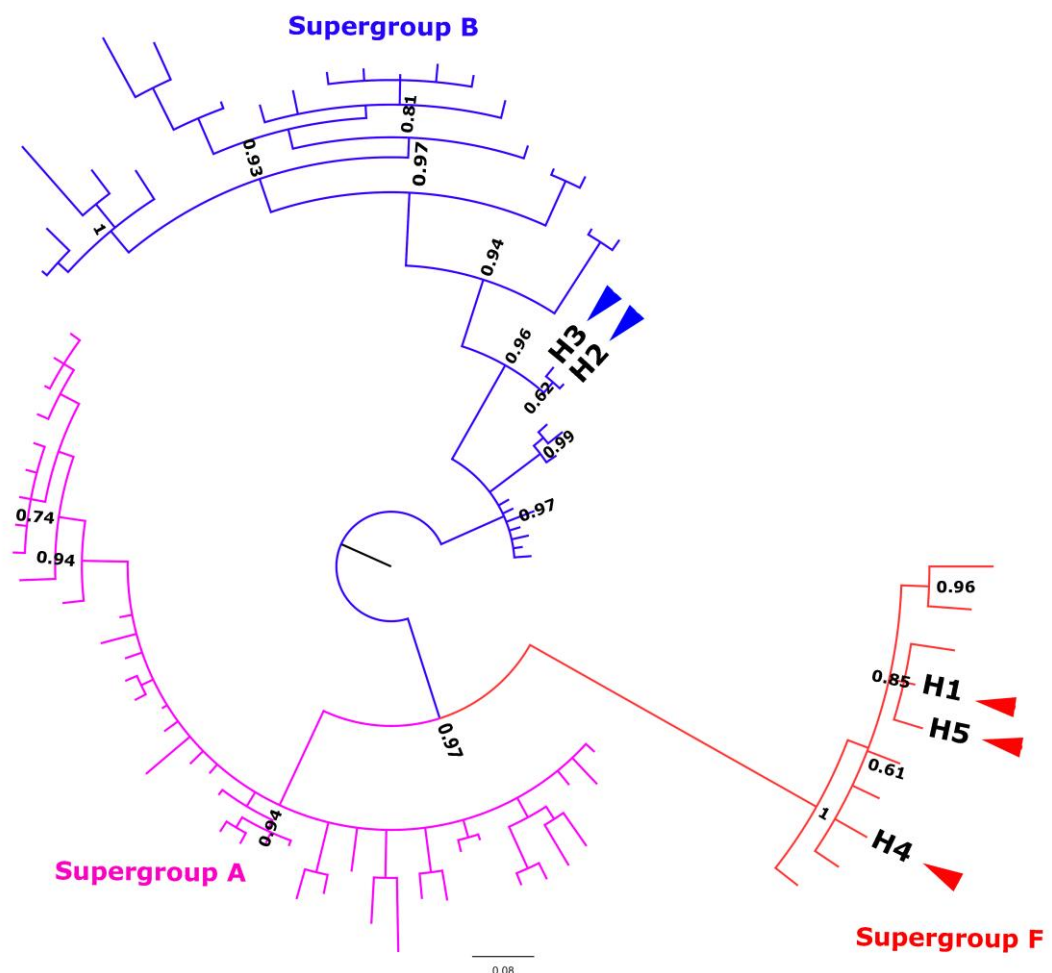

248  
249 Figure 1: (Online colour figure) Summary unrooted phylogenetic tree of *fbpA* alleles in several insects,  
250 including *Chorthippus parallelus*, obtained by Bayesian inference. Alleles described in *C. parallelus* are named H1 to  
251 H5 (marked as coloured arrows). Posterior probabilities are shown at the nodes. Other MLST genes are also  
252 analysed (Supplemental Fig. S2-S6). Sequence accession numbers are presented in Tables S13-S18.

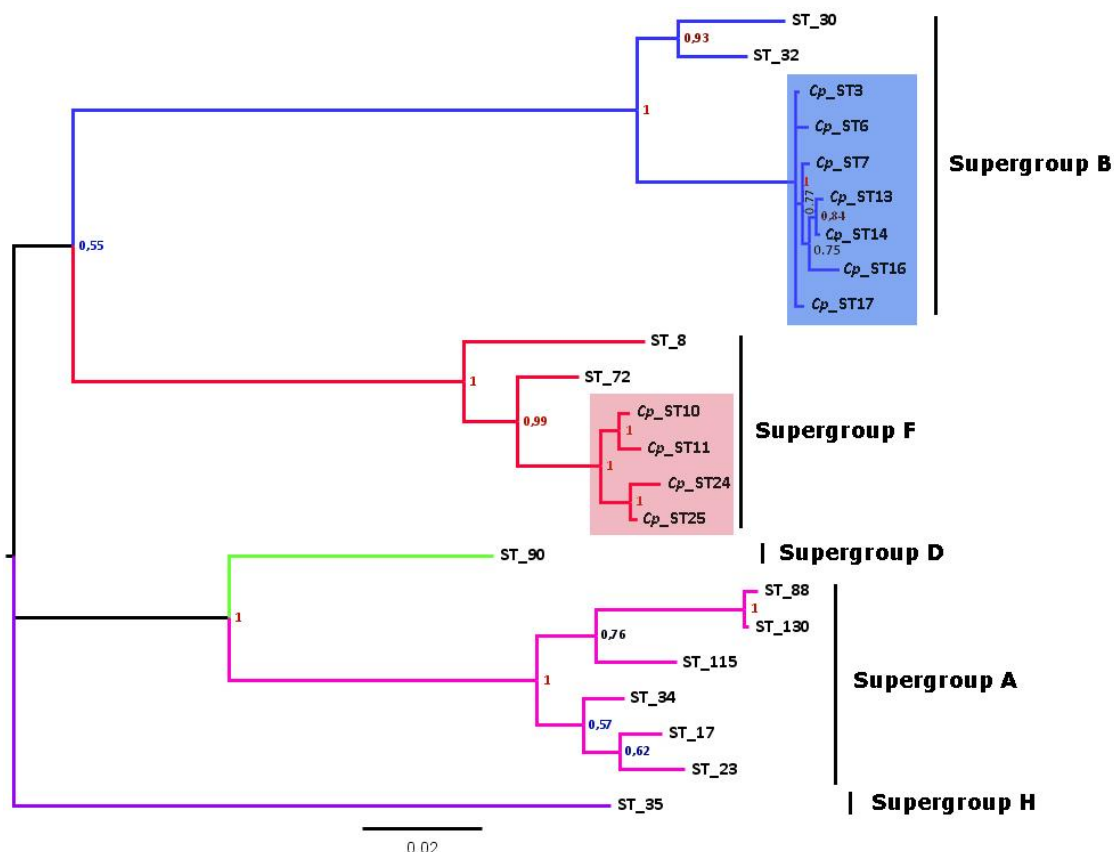

Figure 2: (Online colour figure) Phylogenetic tree of *Wolbachia* STs detected in *C. parallelus* (marked as Cp, coloured squares) excluding recombinants (see Fig. 4) obtained by Bayesian inference. The alleles described in this grasshopper bear the prefix Cp\_ST. All other STs, named according to the official nomenclature, are available in the MLST database <http://www.mlst.net/>. Posterior probabilities are shown at the nodes.

## 2. Biogeographical distribution of the *Wolbachia* strains:

### 2.1. Individual loci analyses:

Different geographic isolates showed a high level of genetic variation within *Wolbachia* strains: Individual analysis of the 5 loci of MLST and the *wsp* gene allows us to determine a clear geographical pattern. In general, we detected alleles belonging to the B supergroup in *C. p. parallelus* and *C. p. erythropus* populations, indistinctly. By contrast, we can detect some alleles, belonging to F supergroup, specifically in some populations of *C. p. erythropus* or *C. p. parallelus* (see Fig. 3). In addition, we noted the presence of new alleles exclusive to *Wolbachia* infecting the hybrid grasshopper populations (Fig. 1, 3 and S2-S12). For instance and regarding gene *fbpA*, three alleles were identified belonging to supergroup F, and two alleles were

269 assigned to supergroup B (Fig. 1). In the first case, allele 5 has been described in European  
 270 populations of *C. parallelus* and Bubion in southern Spain and in the populations of the  
 271 Cantabrian region (hybrid populations, *sensu* Bella *et al.* 2007). It has also been identified in  
 272 the pure population of Gabas, on the French side of the hybrid zone (ZH France, Fig. 3). Allele  
 273 1, which also belongs to supergroup F, was detected in pure populations from the centre of  
 274 the Iberian Peninsula and in the South Pyrenees populations of Escarrilla, Sallent and Portalet  
 275 (hybrid zone). In the case of supergroup B, allele 2 was found in most of the populations.  
 276 However, in the hybrid populations of Sallent, Corral de Mulas and Portalet (hybrid zone) we  
 277 also detected alleles 3 and 4. Allele 4 has also been detected in Cantabrian hybrid populations.  
 278 Similar patterns have been observed for the rest of the analyzed genes.

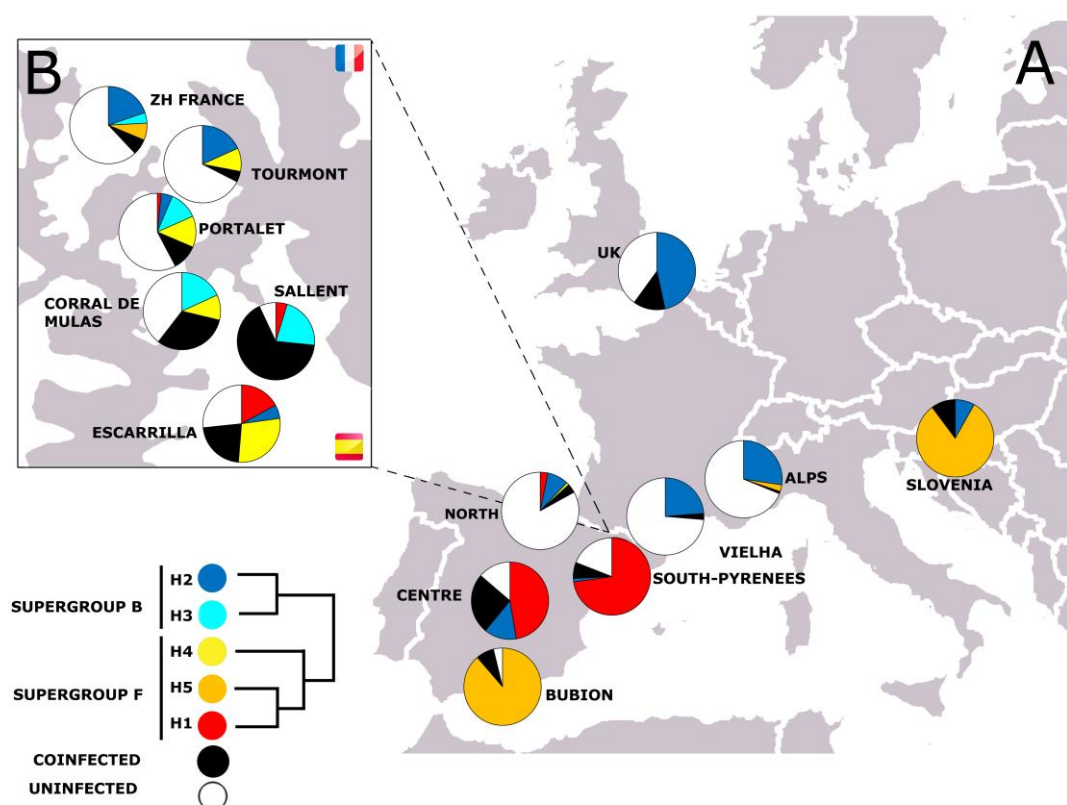

279  
 280 Figure 3. (Online colour figure) A) Geographical distribution of *fbpA* alleles in the *C. parallelus* populations  
 281 analysed. Pyrenean hybrid zone (Tena's valley, Huesca, Spain) is zoomed in B. See Table 1 for details.  
 282

### 283 2.1.1. *Wolbachia* ST- complexes:

284 According with the MLST system implemented in START2 (Jolley *et al.* 2001), we  
 285 classify the different haplotypes or ST in five ST-complexes (each one defined as a group of STs  
 286 sharing a minimum of three alleles) (Fig. 4). The first ST-complex included several STs, some of  
 287 them belonging to the F supergroup or recombinants highly related to this supergroup (see  
 288 before, *Wolbachia* phylogeny), sampled in several non-Iberian populations from the rest of  
 289 Europe and in some samples from the Basque Country in the north of Spain. The second ST  
 290 complex, included isolates belonging to the B supergroup (and some recombinants, highly  
 291 related to the B supergroup) widely distributed in *C. parallelus* populations, including both  
 292 subspecies, but in different proportions. ST3 and ST4 complexes also include some  
 293 recombinants and B strains. Finally, ST5 complex belongs to F supergroup but it shares some  
 294 alleles with those of the B supergroup. They have been detected in *C. p. erythropus*, including  
 295 some populations of the centre of Spain, and the Spanish region of the Pyrenees. The  
 296 geographical distribution of each ST is showed in Fig. 4.

| ST-complex | ST | gatB | coxA | hcpA | ftsZ | fbpA | Type | n  | population                                                  |
|------------|----|------|------|------|------|------|------|----|-------------------------------------------------------------|
| ST1        | 2  | 1    | 2    | 3    | 2    | 5    | R    | 1  | ZH France                                                   |
| ST1        | 9  | 2    | 1    | 1    | 1    | 2    | R    | 1  | ZH France                                                   |
| ST1        | 10 | 2    | 1    | 1    | 2    | 1    | F    | 2  | ZH France                                                   |
| ST1        | 11 | 2    | 1    | 3    | 2    | 5    | F    | 13 | Bubion(3), Alps(3) and Slovenia (7)                         |
| ST1        | 12 | 2    | 2    | 3    | 2    | 5    | R    | 11 | ZH France                                                   |
| ST2        | 1  | 1    | 1    | 5    | 1    | 5    | R    | 1  | South Pyrenees                                              |
| ST2        | 3  | 1    | 2    | 5    | 1    | 2    | B    | 4  | Escarrilla(1), Centre(3)                                    |
| ST2        | 5  | 1    | 5    | 3    | 1    | 2    | R    | 1  | Vielha                                                      |
| ST2        | 6  | 1    | 5    | 5    | 1    | 2    | B    | 10 | Vielha (3), Slovenia(1), Alps (3), ZH France(3), Inland (3) |
| ST2        | 7  | 1    | 5    | 5    | 1    | 3    | B    | 1  | ZH France                                                   |
| ST2        | 8  | 1    | 5    | 5    | 2    | 2    | R    | 1  | South Pyrenees                                              |
| ST2        | 17 | 3    | 5    | 5    | 1    | 2    | B    | 4  | North                                                       |
| ST2        | 26 | 4    | 5    | 4    | 1    | 2    | R    | 1  | Escarrilla                                                  |
| ST3        | 13 | 3    | 2    | 2    | 1    | 3    | B    | 2  | Sallent                                                     |
| ST3        | 14 | 3    | 2    | 4    | 1    | 3    | B    | 3  | Sallent(2), CM(1)                                           |
| ST3        | 16 | 3    | 2    | 7    | 1    | 3    | B    | 2  | CM                                                          |
| ST3        | 30 | 5    | 2    | 2    | 1    | 2    | R    | 1  | Portalet                                                    |
| ST3        | 32 | 5    | 6    | 7    | 1    | 2    | B    | 1  | Tourmont                                                    |
| ST4        | 22 | 4    | 3    | 9    | 3    | 3    | R    | 1  | Portalet                                                    |
| ST4        | 27 | 4    | 6    | 6    | 3    | 3    | R    | 1  | Portalet                                                    |
| ST4        | 29 | 4    | 6    | 7    | 3    | 3    | R    | 1  | Portalet                                                    |
| ST4        | 31 | 5    | 3    | 7    | 3    | 3    | B    | 1  | Portalet                                                    |
| ST4        | 33 | 5    | 6    | 7    | 3    | 3    | B    | 1  | Portalet                                                    |
| ST5        | 4  | 1    | 4    | 8    | 4    | 1    | R    | 1  | Escarrilla                                                  |
| ST5        | 15 | 3    | 2    | 6    | 5    | 3    | R    | 1  | CM                                                          |
| ST5        | 18 | 4    | 2    | 6    | 5    | 3    | R    | 1  | CM                                                          |
| ST5        | 19 | 4    | 2    | 6    | 5    | 4    | R    | 3  | CM(2), Portalet(1)                                          |
| ST5        | 20 | 4    | 2    | 9    | 5    | 4    | R    | 1  | Tourmont                                                    |
| ST5        | 21 | 4    | 3    | 9    | 2    | 4    | R    | 3  | Portalet(2), Tourmont(1)                                    |
| ST5        | 23 | 4    | 4    | 6    | 4    | 4    | R    | 3  | Escarrilla(2), CM(1)                                        |
| ST5        | 24 | 4    | 4    | 6    | 5    | 4    | F    | 4  | Escarrilla(3), CM(1)                                        |
| ST5        | 25 | 4    | 4    | 8    | 5    | 1    | F    | 12 | Centre(6), Pyrenees(5), Sallent(1)                          |
| ST5        | 28 | 4    | 6    | 6    | 5    |      | R    | 5  | Portalet                                                    |

Figure 4: (Online colour figure) *Wolbachia* ST-complexes and allelic profiles described in *C. parallelus*. Note the classification in three groups: those assigned to supergroups F and B strains ("F" and "B", respectively) and those in which possible recombination events between these supergroups were observed ("R"). Alleles belonging to F supergroup (see Fig. 1 and S2-S6) are marked with different red tones, while alleles belonging to the B supergroup are marked with blue tones. STs detected in only one individual (blue) should be interpreted with caution, even if the alleles appear in more than one sample. The name of population and number of individual (parenthesis) detected in each population are also indicated.

The ClonalFrame-based analysis infers *Wolbachia* microevolution using the multilocus sequence data and considers recombination. The genealogies confirmed the genetic subdivisions in the strains of the F supergroup (Fig. 5), while B strains were grouped in the same clade. The genealogies also detected the recombinant strains that mostly appear in the





of Bubion; see Discussion). The AMOVA indicated a geographic division of the F supergroup: (i) Central Iberian Peninsula and South Pyrenees populations, (ii) Pyrenean hybrid zone populations, (iii) French side of the hybrid zone, and (iv) Non-Iberian populations from the rest of Europe and Bubion (in Spain) (Table 3).

These results were also supported by the locus-by-locus AMOVA (except for *hcpA*) (Table S4) and the exact test of population differentiation (Rousset *et al.* 1992) (Table S5).

In addition, the Mantel tests confirmed that the genetic and geographic distances were correlated ( $r_{Y1}$ : 0.338,  $p=0.001$ ). This correlation was stronger when the Bubion data were excluded ( $r_{Y1}$ : 0.483,  $p=0.003$ ). This particular geographical distribution could be related to the biogeographical distribution of this grasshopper during the last glaciation and allows us to infer the origin of *Wolbachia* infection in *C. parallelus* and its role in establishing the hybrid zone.

### 3. Estimation of *Wolbachia* divergence dates

Previous studies suggest a synonymous divergence rate of about 0.90% per million years (MY) for bacteria. However, this bacterial molecular clock should be interpreted with caution since divergence rates may differ between bacteria species (Ochman *et al.* 1999; Ochman & Wilson 1987; Raychoudhury *et al.* 2009). Based on this estimate, the divergence between the F strains detected in the centre of Spain (Cp\_ST-25) and Slovenia (Cp\_ST-11) is about 3,400,000 years. On the other hand, the divergence between the F strains detected in the centre of Spain (Cp\_ST-25) and the hybrid zone (Cp\_ST-24) is about 1,400,000 years. B strains detected in the centre of Spain (Cp\_ST-3) and the widely distributed Cp\_ST-6 diverged about 250,000 years ago. The dates of divergence of strains based on the different markers are illustrated in supplementary Tables S6-S12. Substitution rate could represent a lower boundary for the mutation rate within strains (Emerson 2007). Thus, other estimation of intraspecific mutation rate (in terms of *D. melanogaster* generations ( $6.87E-10$  per position per insect

346 generation in the 3rd position, see Richardson *et al.* 2012) have been used. Divergence  
347 between strains could be higher (x 10) if we consider this estimation of *Wolbachia*  
348 evolutionary rates.

## Discussion

### *Modes of acquisition of Wolbachia. Codivergence vs. horizontal transmission.*

Three hypotheses about the origin of *Wolbachia* in *Chorthippus parallelus* are discussed:

Firstly, an ancient co-divergence between *Wolbachia* and this orthopteroid. Secondly, the acquisition of *Wolbachia* before the subspecies divergence, and the recent co-divergence of *Wolbachia* and the host. And thirdly, the recent acquisition of *Wolbachia* by horizontal transmission.

*Wolbachia* codivergence with their host is extremely rare in the literature compared with horizontal acquisition between species (Raychoudhury *et al.* 2009). To distinguish between co-divergence and horizontal transmission events, a good knowledge of the recent evolutionary history of the host is required as it happens with the *C. parallelus* system which becomes a good model to study *Wolbachia* expansion. Our *Wolbachia* phylogenetic and phylogeographic data can also be interpreted in the context of its host evolution so serving to infer the *Wolbachia* transmission and evolution in this particular grasshopper and its influence in the hybrid zone.

Not discarding other mechanisms that could also be involved (some paternal transmission, infection loss, drive, etc.), our data point out two possible mechanisms to explain current *Wolbachia* infection in both *Chorthippus parallelus* subspecies: the codivergence of *Wolbachia* F strains during recent speciation of both subspecies followed by “modern” horizontal transmission of B strains from other organisms.

### **a) Phylogenetic relationships & common biogeography between host and bacteria.**

Phylogenetic data support that bacterial F strains infecting *Chorthippus* are extremely similar among them, and that they are highly related each other than with any other outside this grasshopper's taxa (see Fig. 1, 2 and supplemental figures S2-S6). These data support the recent co-divergence between host and bacteria. Furthermore, the geographical distribution of two main F bacterial lineages is largely congruent with the biogeography of *C. parallelus* (Lunt et al; 1998). Cp25 and Cp24 lineages infect *C. p. erythropus*, while Cp11 infects mainly *C. p. parallelus* (except the Iberian southern population of *C. p. erythropus* of Bubion). Hybrid grasshoppers are infected by variants of both lineages. Strains geographical distribution supports the co-divergence between the two subspecies and the two main F strains infecting *C. parallelus*.

However, the co-divergence between *Wolbachia* and their host should be "recent". F supergroup (based on 16S rRNA and Ftsz genes) has been detected in the bush cricket species *Orocharis saltator* and *Hapithus agitator* (Gryllidae: Eneopterinae) but no in other Acrididae (both families have diverged 300 Ma ago; see Song et al. 2015). In addition, both F *Wolbachia* infecting *Chorthippus* are closer to strains infecting other insect orders than to this Gryllidae one. This suggests that the F strain of *Wolbachia* was acquired by horizontal transmission before the divergence between subspecies, followed by co-divergence between each host and bacteria in their corresponding glacial refugia and during postglacial expansion.

By contrast, B supergroup strains infect homogeneously both subspecies, without a biogeographical pattern. The variability within B supergroup is restricted to the hybrid zone, in which new variants and alleles, highly related, appear. All data suggest a recent and quick horizontal transmission of B strain to this host.

## **b) Divergence time estimation:**

Our current data serve to estimate the divergence time of *Wolbachia* according with a general bacterial molecular clock (Ochman et al. 1999; Ochman & Wilson 1987; Raychoudhury

*et al.* 2009). This supports that the divergent time of *Wolbachia* F strains is higher (3.4-1.4 Myr) than *C. parallelus* subspecies divergence time (500.000 years according with mtDNA data, Hewitt, 1996). However, this estimation could represent a lower boundary for the mutation rate within species (Emerson 2007). Furthermore, we have also estimated this time of *Wolbachia* divergence higher (x10) according with some specific *Wolbachia* mutation rates noticed in *Drosophila* (Richardson *et al.*, 2012). However, several factors can lead to inappropriate estimation of divergence dates. For instance, this estimation in *Drosophila* could be inappropriate for *Chorthippus*, in which each host generation takes one year, which modifies the dynamic of *Wolbachia* transmission, not discarding possible bottlenecks of bacterial population, selection pressures, etc. Due to that, we think that the divergence times are compatible, even when they are not coincident, and support an ancient acquisition of F *Wolbachia*, followed by its co-divergence with their *Chorthippus* hosts.

By contrast, B *Wolbachia* divergence times are lower, and suggest a more “recent” acquisition by *C. parallelus* by horizontal transmission. The existence of an extremely close B strain of *Wolbachia* in a number of orthopteran species that share the same habitats also support this hypothesis (Martinez-Rodriguez, 2013):

### **c) Horizontal transmission from other taxa:**

We have detected extremely closely related B strains in other orthopteroids like *Podisma pedestris*, *Chorthippus vagans* and *EuChorthippus chopardi* (Acrididae) but also *Ruspolia nitidula* (Tettigoniidae) that share habitat with *Chorthippus* (data no shown, Martinez-Rodriguez, 2013). Most genera belonging to family Acrididae diverged 50 Ma ago, and both families (Acrididae and Tettigoniidae) did it 250 Ma ago (Song *et al.* 2015). The incongruence between *Wolbachia* and host divergence times supports that the B supergroup could have been “recently” acquired as a result of rapid expansion of the infection from other taxa

(horizontal transmission). In this context, some species of parasitoids could be a vector for intra- or inter-specific infection transmission (unpublished data, Martinez-Rodriguez, 2013).

By contrast, a recent horizontal transmission of F strain is unlikely. There is no evidence of closely F *Wolbachia* strains currently infecting other Orthoptera. However, F strain (usual mutualist of nematodes, but also present in arthropods) could infect another insect in the past and explain the horizontal transmission of *Wolbachia* to an ancestral *C. parallelus* before subspecies divergence. Even if we cannot totally discard a recent horizontal transmission, we consider that the hypothesis of 2 independent “recent” acquisitions of 2 related F strains to this 2 geographically distant subspecies of *Chorthippus* is unlikely. In our opinion, the hypothesis of an “ancient” acquisition (>4 Myr) and consecutive co-divergence of *Wolbachia* F strains is more likely.

This hypothesis is also supported by the detection of an insertion of *Wolbachia* that coincides in homologous chromosomes of both Cpe and Cpp, while other inserts are subspecies-specific (Funkhouser-Jones *et al.* 2015, Toribio-Fernandez *et al.*, *in. prep.*). This recent finding supports that an ancestral *Chorthippus* sp. was already infected by *Wolbachia*, before divergence of two subspecies.

### *Diversification of Wolbachia inside the hybrid zone:*

The ST distribution suggests that there is a particular pattern of *Wolbachia* infection within the Pyrenean grasshopper hybrid zone and suggests that the particular interaction between host “hybrid genomes” and bacterial infection could happen. B and F supergroups are in contact in several populations of *Chorthippus parallelus*, to the point of coexisting in the same individuals (coinfection, see below). However, we only have detected these new, recombinant strains in hybrid populations (inside the Pyrenees hybrid zone but also in a hybrid population in northern Spain).

High recombination between *Wolbachia* strains has been reported several times (Foster *et al.* 2011; Jiggins 2002; Jiggins *et al.* 2001; Verne *et al.* 2007; Werren & Bartos 2001). In fact, recombination levels in *Wolbachia* seem to be higher than, for example, in *Neisseria meningitidis*, which is considered a bacterium with a great capacity for recombination (Jolley *et al.* 2005). However, different recombination rates between strains have been detected (Klasson *et al.* 2009). The recombination process serves the strains to vary and adapt rapidly, which is important for their interaction with the host. For instance, data show that mutualist strains, adapted to a particular host, have limited levels of recombination compared with other strains than potentially should adapt to a new host (Jiggins 2002; Werren & Bartos 2001). Actually, the preservation of a high number of genes of recombination guarantees genomic flexibility during recurrent host change (Darby *et al.*, 2007; Hurst *et al.*, 2002).

This hypothesis is pertinent to the case of *Wolbachia* strains that infect hybrid *C. parallelus*. The contact of bacteria with in a new host (the hybrid grasshoppers) could have resulted in a high bacterial recombination rate in order to adapt to this new host. It might explain why our analyses detect recombinant strains infecting grasshoppers just in hybrid populations, although the F and B supergroups are in contact in many other *C. parallelus* populations (Bella *et al.* 2010; Zabal-Aguirre *et al.* 2010; Zabal-Aguirre *et al.* 2014).

In addition, we also detected, specifically in the grasshopper hybrid zone, new bacterial alleles belonging to these recombinant strains, which have diverged from closely related B and F alleles found in other isolates. This suggests that sequences diverged rapidly after recombination. Possible explanations include that *Wolbachia* strains infecting grasshopper hybrids diverged separately of other strains (due to the isolation between hybrids and pure populations) or perhaps these strains support other evolutionary pressures (for instance, adaptation to other a new hybrid host or to the evolutionary processes involved in the hybrid zone). More studies will be needed in order to clarify this.



# *The origin and expansion of Wolbachia infection in C. parallelus and its effects on the dynamic of the hybrid zone:*

We consider that recent codivergence is the best explanation for F *Wolbachia* strains appearance in both subspecies of *C. parallelus*, while B infection is better explained by modern horizontal transmission. According with that, we propose a possible scenario to explain the *C. parallelus Wolbachia's* acquisition (Fig. 6).

The study of *Wolbachia* infecting *C. parallelus* divergence should be considered in the context of the last quaternary ice age in Europe and its consequences for *C. parallelus* distribution: During this glaciation the grasshopper subspecies diverged as a result of their geographic isolation in allopatry (Hewitt 1993, 1996, 1999, 2001, 2011; Serrano *et al.* 1996). After the retreat of the ice, grasshopper populations from the Iberian Peninsula colonised the Pyrenees, meeting *C. p. parallelus* coming from the Balkans, as suggested by Lunt *et al.* (1998).

The current data about *Wolbachia* infection suggest that an ancient F strain of *Wolbachia* and an ancestral host could codiverge during this period before meeting when the hybrid zone formation. In addition, a new B infection could have been acquired more recently, and expanded in the pure and hybrid populations afterwards. *Wolbachia* spread by horizontal transmission can be very effective, as previously suggested (Turelli & Hoffmann, 1991). In addition, the lack of B infection in some populations, like Bubion in Southern Spain, also points out a recent spread of infection from continental Europe (where it is massive): the isolation of these individuals and their geographical location has not permitted their infection yet. Loss of an ancestral B infection in this population seems less plausible to us, given the strain's aforementioned homogeneity and abundance.

Finally, after the hybrid zone formation, new strains would have arisen in the hybrid zone by recombination. We are reminded that the appearance of the F strains in the grasshopper populations of central and southern Spain could be explained by an alternative

495 route of colonization (from the East or the South), not discarding either other less  
496 parsimonious hypotheses.

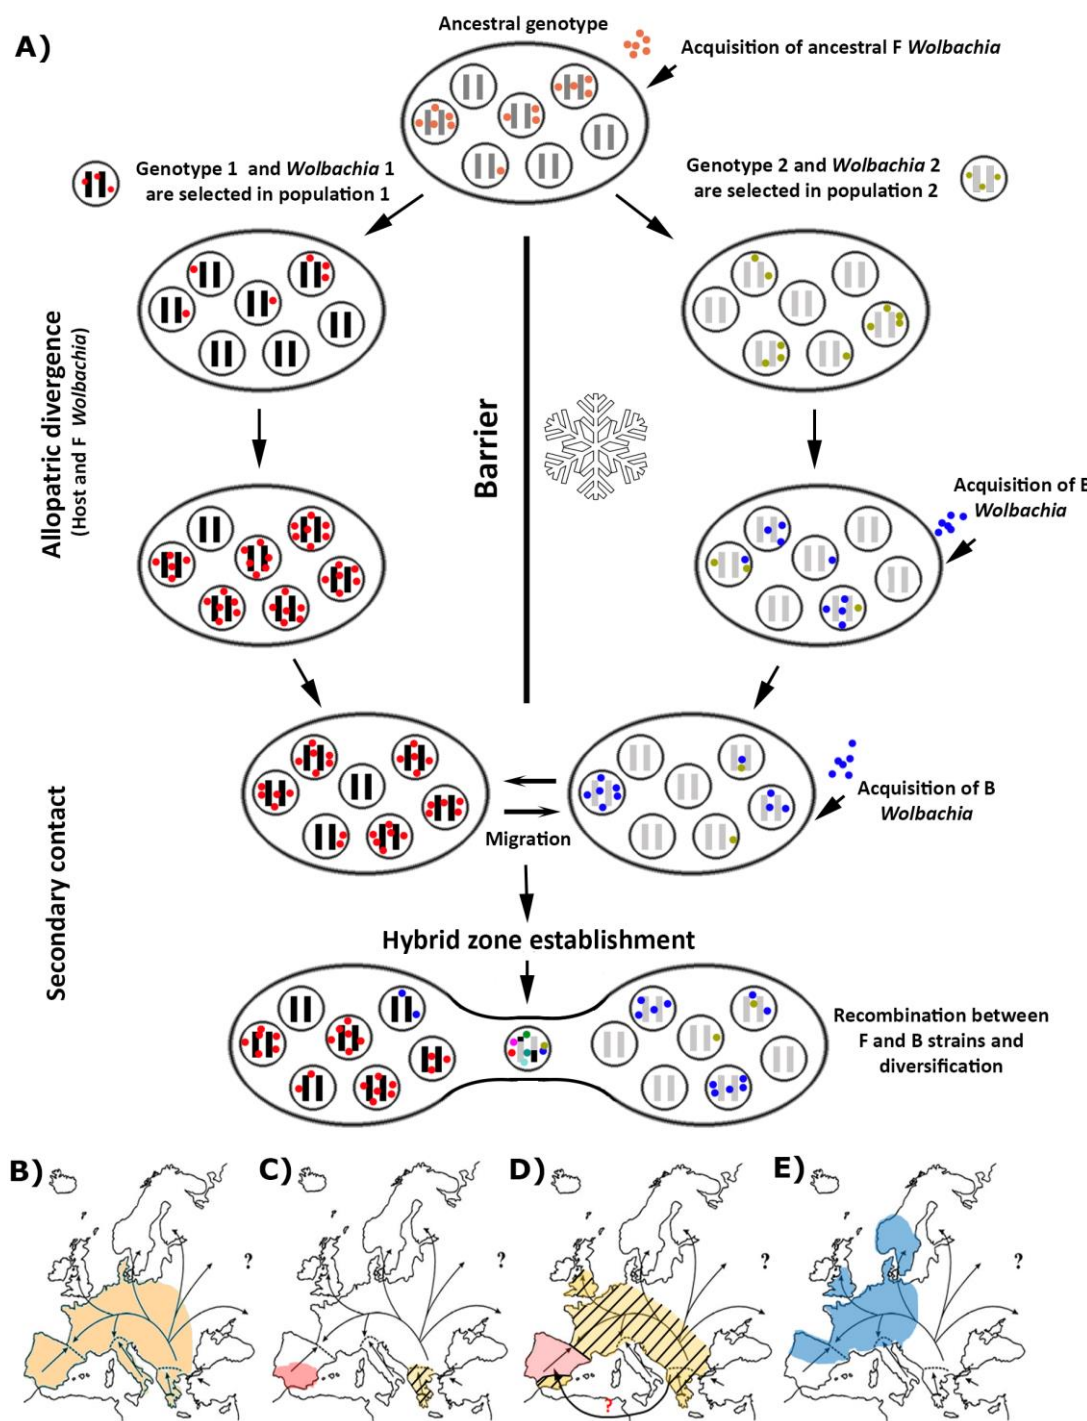

497 Figure 6: (Online colour figure). A) Proposed hypothesis for the origin of *Wolbachia* infection in *C. parallelus*. Each  
498 ellipse represents a population. Inner circles represent individuals. Black and grey bars indicate the host genome,  
499 while the coloured dots show the bacterial type infecting the individual. The hybrid zone would be established  
500 simultaneously with the appearance of recombinant genomes in the host, and a high bacterial diversity, induced by  
501 recombination. B) Spatial representation of the population expansion of infection: the arrows indicate the  
502 population expansion of *C. parallelus* (modified from Hewitt 2001), after the retreat of the glacial ice. Before the last  
503

glaciation the infection of *Wolbachia* by the F supergroup was homogeneous. C) During the last glaciation, *C. parallelus* and F *Wolbachia* diverged in allopatry. D) After the ice disappeared, the pattern of expansion of the F infection coincided with that of the migration of its host, E) Recently, B infection has been transmitted horizontally in different European populations.

## *Wolbachia* effects in the hybrid zone: New perspectives.

Our data suggest that *Wolbachia* already infected *C. parallelus* during the hybrid zone formation. Due to that, *Wolbachia*'s role in the hybrid zone dynamic deserves some discussion: We propose that genetic incompatibilities between the grasshopper subspecies accumulated during the divergence, together with the unidirectional and bidirectional CI that *Wolbachia* induces in the hybrid zone (Zabal-Aguirre *et al.*, 2014) thereby influencing the formation of the current grasshopper hybrid zone. More data are required to quantify the importance of CI in hybrid formation.

In the other hand at least two F strains of *Wolbachia* infect differently *C. parallelus* subspecies. New experiments should be carried out in order to verify if further CI exists, induced within those strains belonging to F supergroup. It is possible that these new bacterial lineages or STs, the result of processes of recombination between strains from supergroups F and B, and their subsequent diversification by point mutations and adaptation, would limit the incompatibility between grasshopper individuals infected by different supergroups in hybrid populations, favouring the appearance of a new, mixed bacterial and host genetic background in this area, in contrast to the pure populations on either side of the Pyrenees. This new scenario should be tested to know the current and actual role of *Wolbachia* in the *C. parallelus* hybrid zone and for a better study of this model of incipient speciation.

## 527            **Acknowledgments**

528            We are grateful to the authorities that gave us permission to collect the specimens  
 529 analysed here: Parc National des Pyrénées, Parque Nacional de Sierra Nevada, Comunidad  
 530 Autónoma de Madrid, Comunidad Autónoma de Aragón, Comunidad Autónoma de Castilla y  
 531 León, Parc National du Mercantour Alpes-Maritimes. Dr PL Mason (University of Glasgow, UK)  
 532 helped us with the manuscript and Dr JR Dagley and Dr R Kostanjšek kindly provided the  
 533 individuals from the Epping Forest (UK) and Mokronog (Slovenia), respectively. We also thank  
 534 other members of our HYZO group in the Universidad Autónoma de Madrid, who helped with  
 535 insect collection and handling, or contributed to discussions about our study. This work has  
 536 been supported by the Spanish MINECO I+D+i grants CGL2009-08380/BOS and CGL2012-35007  
 537 and the collaboration of Chromacell.

## 538            **Data accessibility**

539            DNA sequences: GenBank database under accession numbers KM078849-KM078883

## 540            **Author contribution:**

541            Martinez-Rodriguez, P designed research, performed research, analyzed data and  
 542 wrote the paper. Arroyo-Yebras, F performed research. Bella, JL designed research, analyzed  
 543 data and wrote the paper. All of them, with the contribution in some cases of other members  
 544 of the group and the collaborators cited in the acknowledgments section, collected the  
 545 grasshoppers.

# References

- 547 Akaike H (1974) A new look at the statistical model identification. *IEEE Transactions on*  
548 *Automatic Control* **19**, 716–772.
- 549 Baldo L, Bordenstein S, Wernegreen JJ, Werren JH (2006a) Widespread recombination  
550 throughout *Wolbachia* genomes. *Molecular Biology and Evolution* **23**, 437–449.
- 551 Baldo L, Hotopp JCD, Jolley KA, *et al.* (2006b) Multilocus sequence typing system for the  
552 endosymbiont *Wolbachia pipientis*. *Applied and Environmental Microbiology* **72**, 7098–  
553 7110.
- 554 Baldo L, Lo N, Werren JH (2005) Mosaic nature of the *Wolbachia* surface protein. *Journal of*  
555 *Bacteriology* **187**, 5406–5418.
- 556 Baudry E, Bartos J, Emerson K, Whitworth T, Werren JH (2003) *Wolbachia* and genetic  
557 variability in the birdnest blowfly *Protocalliphora sialia*. *Molecular Ecology* **12**, 1843–  
558 1854.
- 559 Bella JL, Martínez-Rodríguez P, Arroyo-Yebras F, *et al.* (2010) *Wolbachia* Infection in the  
560 *Chorthippus parallelus* Hybrid Zone: Evidence for Its Role as a Reproductive barrier.  
561 *Journal of Orthoptera Research* **19**, 205–212.
- 562 Bella JL, Serrano L, Orellana J, Mason PL (2007) The origin of the *Chorthippus parallelus* hybrid  
563 zone: chromosomal evidence of multiple refugia for Iberian populations. *Journal of*  
564 *Evolutionary Biology* **20**, 568–576.
- 565 Bordenstein SR, Paraskevopoulos C, Dunning Hotopp JC, Sapountzis P, Lo N, Bandi C, Tettelin  
566 H, Werren JH, Bourtzis K. (2009) Parasitism and mutualism in *Wolbachia*: what the  
567 phylogenomic trees can and cannot say. *Molecular Biology and Evolution* **26**, **231–241**.
- 568 Darby AC, Cho NH, Fuxelius HH, Westberg J, Andersson SG (2007) Intracellular pathogens go  
569 extreme: genome evolution in the Rickettsiales. *Trends in Genetics* **23**, 511–520.
- 570 Didelot X, Falush D (2007) Inference of Bacterial Microevolution Using Multilocus Sequence  
571 Data. *Genetics* **175**, 1251–1266.
- 572 Dillon RJ, Webster G, Weightman AJ, *et al.* (2008) Composition of Acridid gut bacterial  
573 communities as revealed by 16S rRNA gene analysis. *Journal of Invertebrate Pathology*  
574 **97**, 265–272.
- 575 Emerson BC (2007) Alarm bells for the molecular clock? No support for Ho *et al.*’s model of  
576 time-dependent molecular rate estimates. *Systematic Biology* **56**, 337–345
- 577 Excoffier L, Laval G, Schneider S (2005) ARLEQUIN ver. 3.0: an integrated software package for  
578 population genetics data analysis. *Evolutionary Bioinformatics Online* **1**, 47–50.
- 579 Flanagan NS, Mason PL, Gosálvez J, Hewitt GM (2001) Chromosomal differentiation through an  
580 Alpine hybrid zone in the grasshopper *Chorthippus parallelus*. *Journal of Evolutionary*  
581 *Biology* **12**, 577 - 585.
- 582 Foster J, Slatko B, Bandi C, Kumar S (2011) Recombination in *Wolbachia* Endosymbionts of  
583 Filarial Nematodes? *Applied and Environmental Microbiology* **77**, 1921–1922.

584 Funkhouser-Jones LJ, Sehnert SR, Martínez-Rodríguez P, Toribio-Fernández R, Pita M, Bella JL,  
585 Bordenstein SR (2015) *Wolbachia* co-infection in a hybrid zone: discovery of horizontal  
586 gene transfers from two *Wolbachia* supergroups into an animal genome. *PeerJ*. 2015;  
587 3: e1479.

588 Gerth M, Gansauge M-T, Weigert A, Bleidorn C (2014) Phylogenomic analyses uncover origin  
589 and spread of the *Wolbachia* pandemic. *Nature Communications* 5:5117 doi:  
590 10.1038/ncomms6117

591 Hasegawa M, Kishino H, Yano T (1985) Dating of the human-ape splitting by a molecular clock  
592 of mitochondrial DNA. *Journal of Molecular Evolution*. **22**, 160-74.

593 Hewitt GM (1993) After the ice - parallelus meets erythropus in the Pyrenees. In: *Hybrid Zones*  
594 *and the Evolutionary Process* (ed. Harrison RG), pp. 140-164. Oxford University Press,  
595 Oxford.

596 Hewitt GM (1996) Some genetic consequences of ice ages, and their role in divergence and  
597 speciation. *Biological Journal of the Linnean Society* **58**, 247–276.

598 Hewitt GM (1999) Post-glacial re-colonization of European biota. *Biological Journal of the*  
599 *Linnean Society* **68**, 87-112.

600 Hewitt GM (2001) Speciation, hybrid zones and phylogeography - or seeing genes in space and  
601 time. *Molecular Ecology* **10**,(3) 537-49.

602 Hewitt GM (2011) Quaternary phylogeography: the roots of hybrid zones. *Genetica* **139**, 617-  
603 638.

604 Hurst GDD, Jiggins FM, Pomiankowski A (2002) Which Way to Manipulate Host Reproduction?  
605 *Wolbachia* That Cause Cytoplasmic Incompatibility Are Easily Invaded by Sex Ratio  
606 Distorting Mutants. *The American Naturalist* **160**, 360-373.

607 Jiggins FM (2002) The rate of recombination in *Wolbachia* bacteria. *Molecular Biology and*  
608 *Evolution* **19**, 1640-1643.

609 Jiggins FM, von der Schulenburg JHG, Hurst GDD, Majerus MEN (2001) Recombination  
610 confounds interpretations of *Wolbachia* evolution. *Proceedings of the Royal Society B-*  
611 *biological Sciences* **268**, 1423-1427.

612 Jolley KA, Feil EJ, Chan M-S, Maiden MCJ (2001) Sequence type analysis and recombinational  
613 tests (START). *Bioinformatics* **17**, 1230-1231.

614 Jolley KA, Wilson DJ, Kriz P, Mcvean G, Maiden MCJ (2005) The Influence of Mutation,  
615 Recombination, Population History, and Selection on Patterns of Genetic Diversity in  
616 *Neisseria meningitidis*. *Molecular Biology and Evolution* **22**, 562-569.

617 Keller GP, Windsor DM, Saucedo JM, Werren JH (2004) Reproductive effects and geographical  
618 distributions of two *Wolbachia* strains infecting the Neotropical beetle, *Chelymophra*  
619 *alternans* Boh. (Chrysomelidae, Cassidinae). *Molecular Ecology* **13**, 2405-2420.

620 Klasson L, Westberg J, Sapountzis P, *et al.* (2009) The mosaic genome structure of the  
621 *Wolbachia* wRi strain infecting *Drosophila simulans*. *Proceedings of the National*  
622 *Academy of Sciences of the United States of America* **106**, 5725-5730.

623 Kremer N, Huigens ME (2011) Vertical and horizontal transmission drive bacterial invasion.  
624 *Molecular Ecology* **20**, 3496-3498.



625 Librado P, Rozas J (2009) DnaSP v5: A software for comprehensive analysis of DNA  
626 polymorphism data. *Bioinformatics* **25**, 1451-1452.

627 Lunt D, Ibrahim K, Hewitt G (1998) mtDNA phylogeography and postglacial patterns of  
628 subdivision in the meadow grasshopper *Chorthippus parallelus*. *Heredity* **80**, 633-641.

629 Maiden MCJ, Bygraves JA, Feil E, *et al.* (1998) Multilocus sequence typing: A portable approach  
630 to the identification of clones within populations of pathogenic microorganisms.  
631 *Proceedings of the National Academy of Sciences of the United States of America* **95**,  
632 3140-3145.

633 Martin D, Lemey P, Lott M, *et al.* (2010) RDP3: a flexible and fast computer program for  
634 analyzing recombination. *Bioinformatics* **26**, 2462-2463.

635 Martins C, Souza RF, Bueno OC (2012) Presence and distribution of the endosymbiont  
636 *Wolbachia* among *Solenopsis* spp. (Hymenoptera: Formicidae) from Brazil and its  
637 evolutionary history. *Journal of Invertebrate Pathology*. **109**, 287-96

638 Martínez P, Del Castillo P, Bella JL (2009) Cytological detection of *Wolbachia* in squashed and  
639 paraffin embedded insect tissues. *Biotechnic & Histochemistry* **84**, 347-353.

640 Martínez-Rodríguez P (2013) *Divergencia inducida por Wolbachia en la zona híbrida de*  
641 *Chorthippus parallelus* (Orthoptera). PhD Thesis. Universidad Autónoma de Madrid.

642 Martínez-Rodríguez P, Hernández-Pérez M, Bella J (2013a) Detection of *Spiroplasma* and  
643 *Wolbachia* in the bacterial gonad community of *Chorthippus parallelus*. *Microbial*  
644 *Ecology* **66**, 211-223.

645 Martínez-Rodríguez P, Sarasa J, Peco B, *et al.* (2013b) Endosymbiont-free ants: molecular  
646 biological evidence that neither *Wolbachia*, *Cardinium* or any other bacterial  
647 endosymbionts play a role in thelytokous parthenogenesis in the Harvester ant  
648 species, *Messor barbarus* and *M. capitatus*. *European Journal of Entomology* **110**, 197-  
649 204.

650 Maynard SJ (1992) Analyzing the mosaic structure of genes. *J Mol Evol* **34**, 126-129.

651 Moran NA, McCutcheon JP, Nakabachi A (2008) Genomics and Evolution of Heritable Bacterial  
652 Symbionts. *Annual Review of Genetics* **42**, 165-190.

653 Ochman H, Elwyn S, Moran NA (1999) Calibrating bacterial evolution. *Proceedings of the*  
654 *National Academy of Sciences* **96**, 12638-12643.

655 Ochman H, Wilson AC (1987) Evolution in bacteria: evidence for a universal substitution rate in  
656 cellular genomes. *J. Molec. Evol.* **26**, 74-86.

657 Padidam M, Sawyer S, Fauquet C (1999) Possible emergence of new geminiviruses by frequent  
658 recombination. *Virology* **265**, 218-225. .

659 Posada D (2008) jModelTest: Phylogenetic model averaging. *Molecular Biology and Evolution*  
660 **25**, 1253-1256.

661 Posada D, Crandall K (2001) Evaluation of methods for detecting recombination from DNA  
662 sequences: Computer simulations. *Proc Natl Acad Sci* **98**, 13757-13762. .

663 Raychoudhury R, Baldo L, Oliveira DCSG, Werren JH (2009) Modes of acquisition of *Wolbachia*:  
664 Horizontal transfer, hybrid introgression, and codivergence in the *Nasonia* species  
665 complex. *Evolution* **63**, 165-183.

- 666 Richardson MF, Weinert LA, Welch JJ, Linheiro RS, Magwire MM, Jiggins FM, Bergman CM  
667 (2012) Population Genomics of the *Wolbachia* Endosymbiont in *Drosophila*  
668 *melanogaster*. *PLoS Genet* 8(12): e1003129.
- 669 Ronquist F, Huelsenbeck JP (2003) MrBayes 3: Bayesian phylogenetic inference under mixed  
670 models. *Bioinformatics* 19, 1572-1574.
- 671 Sarasa J, Bernal A, Fernández-Calvín B, Bella JL (2013) *Wolbachia* Induced Cytogenetical Effects  
672 as Evidenced in *Chorthippus parallelus* (Orthoptera). *Cytogenet Genome Res* 139, 36-  
673 43.
- 674 Saridaki A, Bourtzis K (2010) *Wolbachia*: more than just a bug in insects genitals. *Current*  
675 *Opinion in Microbiology* 13, 67-72.
- 676 Serrano L, delaVega CG, Bella JL, et al. (1996) A hybrid zone between two subspecies of  
677 *Chorthippus parallelus*. X-chromosome variation through a contact zone. *Journal of*  
678 *Evolutionary Biology* 9, 173-184.
- 679 Shoemaker DD, Ahrens M, Sheill L, Mescherc M, Kellerd L, Rosse, KG (2003) Distribution and  
680 prevalence of *Wolbachia* infections in native populations of the fire ant *Solenopsis*  
681 *invicta* (Hymenoptera : Formicidae). *Environmental Entomology* 32, 1329-1336.
- 682 Shuker D, King T, Bella J, Butlin R (2005) The genetic basis of speciation in a grasshopper hybrid  
683 zone. In: *Insect Evolutionary Biology* (ed. Fellowes MHG, Roff J), pp. 427–454. CABI  
684 Publishing, Oxford University Press, Wallingford, Oxon, UK.
- 685 Song H, Amédégnato C, Cigliano MM, Desutter-Grandcolas L, Heads SW, Huang Y, Otte D ,  
686 Whiting MF (2015) 300 million years of diversification: elucidating the patterns of  
687 orthopteran evolution based on comprehensive taxon and gene sampling. *Cladistics*  
688 31, 621–651.
- 689 Telschow A, Hilgenboecker K, Hammerstein P, Werren JH (2014) Dobzhansky-Muller and  
690 *Wolbachia*-Induced Incompatibilities in a Diploid Genetic System. *PLoS ONE* 9, e95488.
- 691 Turelli M, Hoffmann AA (1991) Rapid spread of an inherited incompatibility factor in California  
692 *Drosophila*. *Nature* 353, 440-442.
- 693 Verne S, Johnson M, Bouchon D, Grandjean F (2007) Evidence for recombination between  
694 feminizing *Wolbachia* in the isopod genus *Armadillidium*. *Gene* 397, 58-66.
- 695 Werren JH, Baldo L, Clark ME (2008) *Wolbachia*: master manipulators of invertebrate biology.  
696 *Nat Rev Micro* 6, 741-751.
- 697 Werren JH, Bartos JD (2001) Recombination in *Wolbachia*. *Current Biology* 11, 431-435.
- 698 Yun Y, Peng Y, Liu FX, Lei C (2011) *Wolbachia* screening in spiders and assessment of horizontal  
699 transmission between predator and prey. *Neotropical Entomology* 40, 164-169.
- 700 Zabál-Aguirre M, Arroyo F, Bella JL (2010) Distribution of *Wolbachia* infection in *Chorthippus*  
701 *parallelus* populations within and beyond a Pyrenean hybrid zone. *Heredity* 104, 174-  
702 184.
- 703 Zabál-Aguirre M, Arroyo F, García-Hurtado J, et al. (2014) *Wolbachia* effects in natural  
704 populations of *Chorthippus parallelus* from the Pyrenean hybrid zone. *Journal of*  
705 *Evolutionary Biology* 27, 1136-1148.
- 706 Zug R, Hammerstein P (2012) Still a host of hosts for *Wolbachia*: Analysis of recent data  
707 suggests that 40% of terrestrial arthropod species are infected. *PLoS ONE* 7, e38544.



# 708 Tables:

709 Table 1: Coordinates and designation of sampled populations of *C. parallelus*. (1) Hybrid population  
710 according to (Serrano *et al.*, 1996). (2) Pure *Chorthippus parallelus* population, with some particular cytogenetics  
711 markers (see Bella *et al.* 2007). (3) Hybrid population in northern Spain (as characterized by Bella *et al.* 2007). (4)  
712 Hybrid population, according to (Flanagan *et al.* 1999) between *C. parallelus parallelus* and additional (5) Italian  
713 subspecies.  
714

| Population nomenclature (in figures) | Population                      | Hybrid-pure status             | Latitude         | Longitude      | Altitude (m) |
|--------------------------------------|---------------------------------|--------------------------------|------------------|----------------|--------------|
| <b>Pyrenees-Hybrid Zone</b>          |                                 |                                |                  |                |              |
| HZ France                            | Arudy (France): ARU             | Pure Cpp population            | 43° 06' 01" N    | 0° 26' 38" W   | 411          |
|                                      | Gabas (France): GAB             | Pure Cpp population            | 42° 53' 60" N    | 0° 25' 60" W   | 1020         |
|                                      | L'Hermine (France): HER         | Hybrid population              | 42° 51' 46.8" N  | 0° 23' 30.4" W | 1209         |
|                                      | Soques (France): SOQ            | Hybrid population              | 42° 20' 08" N    | 0° 23' 52" W   | 1396         |
| Tourmont                             | Cabaña Tourmont (France): TOU   | Hybrid population              | 42° 49' 11" N    | 0° 24' 21" W   | 1625         |
| Portalet                             | Portalet (Spain): POR/PORCRU    | Hybrid population              | 42° 48' 03" N    | 0° 24' 54" W   | 1780         |
| CM                                   | Corral de Mulas (Spain): CM     | Hybrid population              | 42° 47' 09.4" N  | 0° 23' 34.4" W | 1569         |
| Sallent                              | Sallent de Gállego (Spain): SAL | Hybrid population <sup>1</sup> | 42° 45' 57.5" N  | 0° 20' 33.9" W | 1343         |
| Escarrilla                           | Escarrilla (Spain): ESC         | Pure Cpe population            | 42° 43' 54.1" N  | 0° 18' 39.3" W | 1130         |
| <b>Pyrenees (other)</b>              |                                 |                                |                  |                |              |
| South-Pyrenees/Vielha                | Puerto del Cantó (Spain): PCAN  | Pure Cpe population            | 42° 22' 12.9" N  | 1°14'11.7" E   | 1725         |
|                                      | Muna (France): MUN              | Pure Cpp population            | 42° 53' 53" N    | 0° 37' 48.8" E | 544          |
|                                      | Vielha (Spain): VIEL            | Pure Cpe population            | 42° 40' 25.3" N  | 0° 46' 26.5" E | 1393         |
| <b>Iberian peninsula</b>             |                                 |                                |                  |                |              |
| Centre                               | Navafria (Spain): NAV           | Pure Cpe population            | 40° 59' 01.95" N | 3° 49' 00.9" W | 1780         |
|                                      | Becedas (Spain): BEC            | Pure Cpe population            | 40° 24' 18" N    | 5° 38' 17.2" W | 1091         |
| Bubion                               | Bubion (Spain): BUB             | Pure Cpe population            | 36° 57' 1.8" N   | 3° 21' 22.8" W | 1332         |

|          |                                |                                  |                  |                  |       |
|----------|--------------------------------|----------------------------------|------------------|------------------|-------|
| North    | Basque Country I (Spain): ALA  | Pure Cpe population <sup>3</sup> | 42° 58' 41.4" N  | 2° 44' 19.7" W   | 625   |
|          | Basque Country II (Spain): URK | Pure Cpe population <sup>3</sup> | 43° 13' 59.1" N  | 2° 29' 22.3" W   | 211   |
| Europe   |                                |                                  |                  |                  |       |
| Alps     | Valdieri (Italy): VAL          | Pure Cp population <sup>5</sup>  | 44° 12' 19.74" N | 7° 22' 47.76" E  | 983   |
|          | Col de L'Arche (France): CLAR  | Hybrid population <sup>4</sup>   | 44° 25' 34.3" N  | 6° 53' 21.6" E   | 1942  |
| UK       | Epping Forest (England): ING   | Pure Cpp population              | 51° 39' 36" N    | 0° 3' 0" E       | 102   |
| Slovenia | Mokronog (Slovenia): SLO       | Pure Cpp population              | 45° 56' 37.17" N | 15° 8' 55.428" E | 242 m |

Table 2: Primer sequences used in the study.

| Gene                                        | Sequences                                           | Amplicon size (bp) |
|---------------------------------------------|-----------------------------------------------------|--------------------|
| <i>16S rRNA (1<sup>st</sup> PCR)</i>        | 16SF: 5' TTG TAG CTT GCT ATG GTA TAA CT 3'          | 1490               |
|                                             | 16SR: 5' ACT GCT ACC TTG TTA CGA CTT 3'             |                    |
| <i>16S rRNA (2<sup>nd</sup> nested-PCR)</i> | Rev: 5' TAT CCC TTC GAA TAG GTA TGA TTT 3'          | 750                |
|                                             | FF: 5' TGA GCC TAT ATT AGA TTA GCT AGT TGG TAA G 3' |                    |
|                                             | FB: 5' GCC TAT ATT AGA TTA GCT AGT TGG TGG A 3'     |                    |
| <i>gatB</i>                                 | gatB_F1: 5' GAK TTA AAY CGY GCA GGB GTT 3'          | 471                |
|                                             | gatB_R1: 5' TGG YAA YTC RGG YAA AGA TGA 3'          |                    |
| <i>coxA</i>                                 | coxA_F1: 5' TTG GRG CRA TYA ACT TTA TAG 3'          | 487                |
|                                             | coxA_R1: 5' CT AAA GAC TTT KAC RCC AGT 3'           |                    |
| <i>hcpA</i>                                 | hcpA_F1: 5' GAA ATA RCA GTT GCT GCA AA 3'           | 515                |
|                                             | hcpA_R1: 5' GAA AGT YRA GCA AGY TCT G 3'            |                    |
| <i>ftsZ</i>                                 | ftsZ_F1: 5' ATY ATG GAR CAT ATA AAR GAT AG 3'       | 524                |
|                                             | ftsZ_R1: 5' TCR AGY AAT GGA TTR GAT AT 3'           |                    |
| <i>fbpA</i>                                 | fbpA_F1: 5' GCT GCT CCR CTT GGY WTG AT 3'           | 509                |
|                                             | fbpA_R1: 5' CCR CCA GAR AAA AYY ACT ATT C 3'        |                    |
| <i>wsp</i>                                  | wsp_F1: GTCCAATARSTGATGARGAAAC                      | 603                |
|                                             | wsp_R1: CYGCACCAAYAGYRCTRATAA)                      |                    |

Table 3: Analysis of molecular variance (AMOVA) from five MLST genes for the F supergroup of *Wolbachia* infecting different populations of *C. parallelus*.

| Source of variation                    | df           | Sum of squares | Variance component | Percentage of variation |
|----------------------------------------|--------------|----------------|--------------------|-------------------------|
| Between groups                         | 3.00         | 820.69         | 13.60              | 39.80                   |
| Between populations within groups      | 9.00         | 305.51         | 4.53               | 13.25                   |
| Between individuals within populations | 53.00        | 850.90         | 16.05              | 46.96                   |
| Total                                  | 65.00        | 1977.11        | 34.19              |                         |
|                                        |              |                |                    |                         |
| <b>Indels:</b>                         | <b>Value</b> | <b>p</b>       |                    |                         |
| F <sub>sc</sub>                        | 0.220        | <0.0001        |                    |                         |
| F <sub>st</sub>                        | 0.530        | <0.0001        |                    |                         |
| F <sub>ct</sub>                        | 0.397        | <0.0001        |                    |                         |

## 721 Supplemental tables:

722 *Table S1: Accession numbers.*

| gen  | allele | Genebank code |
|------|--------|---------------|
| CoxA | H1     | KM078848      |
|      | H2     | KM078849      |
|      | H3     | KM078850      |
|      | H4     | KM078851      |
|      | H5     | KM078852      |
|      | H6     | KM078853      |
| fbpA | H1     | KM078854      |
|      | H2     | KM078855      |
|      | H3     | KM078856      |
|      | H4     | KM078857      |
|      | H5     | KM078858      |
| ftsZ | H1     | KM078859      |
|      | H2     | KM078860      |
|      | H3     | KM078861      |
|      | H4     | KM078862      |
|      | H5     | KM078863      |
| gatB | H1     | KM078864      |
|      | H2     | KM078865      |
|      | H3     | KM078866      |
|      | H4     | KM078867      |
|      | H5     | KM078868      |
| hcpA | H1     | KM078869      |
|      | H2     | KM078870      |
|      | H3     | KM078871      |
|      | H4     | KM078872      |
|      | H5     | KM078873      |
|      | H6     | KM078874      |
|      | H7     | KM078875      |
|      | H8     | KM078876      |
|      | H9     | KM078877      |
|      | H10    | KM078878      |
| wsp  | H1     | KM078879      |
|      | H2     | KM078880      |
|      | H3     | KM078881      |
|      | H4     | KM078882      |
|      | H5     | KM078883      |

723

724

Table S2: *Wolbachia* infection frequencies in the analysed populations:

| NAME                   | n   |     |     |     |       | %    |      |      |      |       |
|------------------------|-----|-----|-----|-----|-------|------|------|------|------|-------|
|                        | Ø   | F   | B   | FB  | total | Ø    | F    | B    | FB   | TOTAL |
| ESC2008                | 19  | 7   | 3   | 9   | 38    | 0,50 | 0,18 | 0,08 | 0,24 | 1,00  |
| ESC2009                | 42  | 34  | 5   | 7   | 88    | 0,48 | 0,39 | 0,06 | 0,08 | 1,00  |
| SAL2008                | 3   | 3   | 12  | 30  | 48    | 0,06 | 0,06 | 0,25 | 0,63 | 1,00  |
| SAL2009                | 9   | 5   | 16  | 21  | 51    | 0,18 | 0,10 | 0,31 | 0,41 | 1,00  |
| CM2008                 | 41  | 9   | 0   | 4   | 54    | 0,76 | 0,17 | 0,00 | 0,07 | 1,00  |
| CM2009                 | 25  | 7   | 10  | 17  | 59    | 0,42 | 0,12 | 0,17 | 0,29 | 1,00  |
| POR2008                | 36  | 14  | 2   | 9   | 61    | 0,59 | 0,23 | 0,03 | 0,15 | 1,00  |
| POR2009                | 69  | 12  | 10  | 0   | 91    | 0,76 | 0,13 | 0,11 | 0,00 | 1,00  |
| C_TOU2008              | 45  | 5   | 9   | 1   | 60    | 0,75 | 0,08 | 0,15 | 0,02 | 1,00  |
| C_TOU2009              | 46  | 4   | 10  | 3   | 63    | 0,73 | 0,06 | 0,16 | 0,05 | 1,00  |
| SOQ2008                | 20  | 2   | 7   | 3   | 32    | 0,63 | 0,06 | 0,22 | 0,09 | 1,00  |
| SOQ2009                | 27  | 3   | 18  | 11  | 59    | 0,46 | 0,05 | 0,31 | 0,19 | 1,00  |
| LHER2008               | 24  | 4   | 15  | 5   | 48    | 0,50 | 0,08 | 0,31 | 0,10 | 1,00  |
| LHER2009               | 23  | 6   | 16  | 10  | 55    | 0,42 | 0,11 | 0,29 | 0,18 | 1,00  |
| GAB2008                | 30  | 6   | 6   | 3   | 45    | 0,67 | 0,13 | 0,13 | 0,07 | 1,00  |
| GAB2009                | 36  | 9   | 10  | 8   | 63    | 0,57 | 0,14 | 0,16 | 0,13 | 1,00  |
| ARU2008                | 20  | 1   | 13  | 0   | 34    | 0,59 | 0,03 | 0,38 | 0,00 | 1,00  |
| ARU2009                | 71  | 2   | 9   | 8   | 90    | 0,79 | 0,02 | 0,10 | 0,09 | 1,00  |
| NAV2007                | 22  | 36  | 17  | 33  | 108   | 0,20 | 0,33 | 0,16 | 0,31 | 1,00  |
| NAV2008                | 0   | 8   | 4   | 10  | 22    | 0,00 | 0,36 | 0,18 | 0,46 | 1,00  |
| PCANTO2008             | 21  | 22  | 0   | 6   | 49    | 0,43 | 0,45 | 0,00 | 0,12 | 1,00  |
| MUNA2008               | 21  | 5   | 19  | 7   | 52    | 0,40 | 0,10 | 0,37 | 0,14 | 1,00  |
| COLLARCHE2009          | 16  | 0   | 5   | 0   | 21    | 0,76 | 0,00 | 0,24 | 0,00 | 1,00  |
| VALDIERI I and II 2009 | 55  | 3   | 17  | 1   | 76    | 0,72 | 0,04 | 0,22 | 0,01 | 1,00  |
| LARGENTERA2009         | 2   | 0   | 6   | 0   | 8     | 0,25 | 0,00 | 0,75 | 0,00 | 1,00  |
| BUBION2004             | 2   | 47  | 0   | 4   | 53    | 0,04 | 0,89 | 0,00 | 0,08 | 1,00  |
| EPPING2002             | 6   | 0   | 7   | 2   | 15    | 0,40 | 0,00 | 0,47 | 0,13 | 1,00  |
| VIELHA2008*            | 28  | 8   | 1   | 1   | 38    | 0,74 | 0,21 | 0,03 | 0,03 | 1,00  |
| URKAREGUI2009          | 35  | 7   | 6   | 1   | 49    | 0,71 | 0,14 | 0,12 | 0,02 | 1,00  |
| TXABARRI2009           | 9   | 0   | 0   | 1   | 10    | 0,90 | 0,00 | 0,00 | 0,10 | 1,00  |
| TARA2008               | 57  | 2   | 6   | 4   | 69    | 0,83 | 0,03 | 0,09 | 0,06 | 1,00  |
| TARA2009               | 73  | 1   | 0   | 3   | 77    | 0,95 | 0,01 | 0,00 | 0,04 | 1,00  |
| ALAV_1_2009            | 33  | 12  | 1   | 1   | 47    | 0,70 | 0,26 | 0,02 | 0,02 | 1,00  |
| SLOVENIA2009           | 0   | 40  | 4   | 5   | 49    | 0,00 | 0,82 | 0,08 | 0,10 | 1,00  |
| TOTAL                  | 966 | 324 | 264 | 228 | 1782  | 0,54 | 0,18 | 0,15 | 0,13 | 1,00  |

Table S3: Genetic diversity:

1. P=analysed positions
2. S= total polymorphic positions
3. Eta= total frequency of mutations
4. K= average number of nucleotide differences
5. Hap= frequency of haplotypes
6. Hd= Haplotype diversity
7. VarHd, Haplotype diversity Variance
8. Pi= nucleotide diversity
9. Theta Waterson =  $4Nu$ , where N is the effective population size, and u is the mutation rate per nucleotide (or per sequence) and per generation (following Watterson 1975, Nei 1987)."
10. Tajima D, FuLiD\*and FuLiF\* statistics to test various predictions of the neutral theory of molecular evolution (according with Tajima 1989) (Fu & Li 1993) and their significance: \*\* 0.1, \*\*\*0.01, G+C= G+C content. R=Recombination (MAXCHI, (Maynard Smith 1992) ).

| Gene        | n   | P   | S  | Eta | K     | Hap | Hd/VarHd   | Pi    | ThetaNuc | AvNumDif | ThetaG | TajimaD  | FuLiD*  | FuLiF*  | G+C   | R<br>(MAXCHI,<br>p<0.01) |
|-------------|-----|-----|----|-----|-------|-----|------------|-------|----------|----------|--------|----------|---------|---------|-------|--------------------------|
| <i>coxa</i> | 111 | 402 | 41 | 42  | 16.25 | 6   | 0.8/0.0002 | 0.040 | 0.020    | 16.251   | 7.951  | 3.238**  | 2.122** | 3.090** | 0.385 | No                       |
| <i>fbpa</i> | 117 | 429 | 61 | 62  | 11.62 | 5   | 0.8/0.0001 | 0.068 | 0.028    | 28.579   | 11.621 | 4.625*** | 2.307** | 3.943** | 0.394 | Yes: 3<br>(83)           |
| <i>ftsZ</i> | 112 | 435 | 59 | 59  | 27.80 | 5   | 0.7/0.0002 | 0.064 | 0.026    | 27.801   | 11.151 | 4.740*** | 2.274** | 3.965** | 0.407 | Yes: 1<br>(34)           |
| <i>gatB</i> | 114 | 370 | 39 | 39  | 17.30 | 5   | 0.7/0.0004 | 0.047 | 0.020    | 17.298   | 7.346  | 4.165*** | 2.092** | 3.517** | 0.370 | No                       |
| <i>hcpA</i> | 115 | 419 | 57 | 57  | 23.66 | 10  | 0.9/0.0002 | 0.056 | 0.026    | 23.662   | 10.719 | 3.815*** | 2.057** | 3.351** | 0.366 | No                       |

Tabla S4: locus by locus AMOVA implemented in ARLEQUIN.

| Locus       | Among groups |      |       |           | Among population, between groups |      |       |           | Within population |      |       |           | Fixation index  |         |                 |         |                 |         |
|-------------|--------------|------|-------|-----------|----------------------------------|------|-------|-----------|-------------------|------|-------|-----------|-----------------|---------|-----------------|---------|-----------------|---------|
|             | SSD          | g.l. | Va(%) | variación | SSD                              | g.l. | Vb(%) | variación | SSD               | g.l. | Vc(%) | variación | F <sub>SC</sub> | P-valor | F <sub>ST</sub> | P-valor | F <sub>CT</sub> | P-valor |
| <i>gatB</i> | 1437156      | 3    | 0.28  | 80.20     | 116632                           | 9    | 0.02  | 5.86      | 258333            | 53   | 0.05  | 13.95     | 0.2957          | 0.0557  | 0.8605          | 0.0000  | 0.8020          | 0.0029  |
| <i>coxA</i> | 1809649      | 3    | 0.35  | 73.60     | 208533                           | 9    | 0.04  | 7.74      | 465152            | 53   | 0.09  | 18.65     | 0.2934          | 0.0059  | 0.8135          | 0.0000  | 0.7360          | 0.0000  |
| <i>HcpA</i> | 1304275      | 3    | 0.17  | 39.07     | 756331                           | 9    | 0.20  | 45.04     | 365152            | 53   | 0.07  | 15.89     | 0.7392          | 0.0000  | 0.8411          | 0.0000  | 0.3907          | 0.0166  |
| <i>ftsZ</i> | 1096416      | 3    | 0.20  | 53.22     | 270250                           | 9    | 0.04  | 11.91     | 677273            | 53   | 0.13  | 34.87     | 0.2547          | 0.0274  | 0.6513          | 0.0000  | 0.5322          | 0.0039  |
| <i>fbpA</i> | 1280584      | 3    | 0.20  | 47.92     | 486841                           | 9    | 0.11  | 25.65     | 593182            | 53   | 0.11  | 26.43     | 0.4925          | 0.0000  | 0.7357          | 0.0000  | 0.4792          | 0.0068  |

Table S5: Exact test of population differentiation following the methodology of Rousset *et al.* (1992) implemented in ARLEQUIN. Gray = populations among which differentiation is observed.

|             | Pto. Cantó       | Centre           | Escarrilla       | Sallent          | Alps             | North            | Vielha           | Bubió | Slovenia | Tourmon t | Portalet | C. Mulas | ZH Franc e |
|-------------|------------------|------------------|------------------|------------------|------------------|------------------|------------------|-------|----------|-----------|----------|----------|------------|
| Pto. Cantó  |                  |                  |                  |                  |                  |                  |                  |       |          |           |          |          |            |
| Centr e     | 0.00458 ± 0.0008 |                  |                  |                  |                  |                  |                  |       |          |           |          |          |            |
| Escar rilla | 0.10008 ± 0.0021 | 0.00216 ± 0.0005 |                  |                  |                  |                  |                  |       |          |           |          |          |            |
| Sallen t    | 0.24378 ± 0.0048 | 0.00015 ± 0.0001 | 0.10440 ± 0.0042 |                  |                  |                  |                  |       |          |           |          |          |            |
| Alps        | 0.06187 ± 0.0015 | 0.00021 ± 0.0001 | 0.03494 ± 0.0017 | 0.39706 ± 0.0041 |                  |                  |                  |       |          |           |          |          |            |
| North       | 0.10136 ± 0.0015 | 0.00207 ± 0.0004 | ≈ 0.00000        | 0.10483 ± 0.0028 | 0.03525 ± 0.0011 |                  |                  |       |          |           |          |          |            |
| Vielh a     | 0.01245 ± 0.0010 | 0.00002 ± 0.0000 | 0.01049 ± 0.0008 | 0.00210 ± 0.0006 | 0.00247 ± 0.0005 | 0.01230 ± 0.0006 |                  |       |          |           |          |          |            |
| Bubió n     | 0.05564 ± 0.0030 | ≈ 0.00000        | 0.02453 ± 0.0024 | 0.03982 ± 0.0011 | 0.00212 ± 0.0004 | 0.02717 ± 0.0008 | 0.00013 ± 0.0001 |       |          |           |          |          |            |

|                  |                     |                     |                     |                     |                     |                     |                     |                     |                     |                     |                     |                     |  |
|------------------|---------------------|---------------------|---------------------|---------------------|---------------------|---------------------|---------------------|---------------------|---------------------|---------------------|---------------------|---------------------|--|
| Slove<br>nia     | 0.50524 ±<br>0.0020 | 0.15809 ±<br>0.0027 | 0.25167 ±<br>0.0021 | 0.70584 ±<br>0.0059 | 0.27881 ±<br>0.0042 | 0.24826 ±<br>0.0023 | ≈ 0.00000           | 0.42498 ±<br>0.0123 |                     |                     |                     |                     |  |
| Tour<br>mont     | 0.01702 ±<br>0.0008 | 0.00038 ±<br>0.0002 | 0.01731 ±<br>0.0006 | 0.01048 ±<br>0.0013 | 0.00451 ±<br>0.0004 | 0.01802 ±<br>0.0009 | ≈ 0.00000           | 0.00146 ±<br>0.0004 | ≈ 0.00000           |                     |                     |                     |  |
| Portal<br>et     | 0.00802 ±<br>0.0009 | ≈ 0.00000           | ≈ 0.00000           | 0.00049 ±<br>0.0003 | 0.00033 ±<br>0.0002 | ≈ 0.00000           | 0.00052 ±<br>0.0001 | 0.00046 ±<br>0.0003 | 0.12316 ±<br>0.0015 | 0.00135 ±<br>0.0003 |                     |                     |  |
| C.<br>Mula<br>s  | 0.39703 ±<br>0.0045 | 0.03246 ±<br>0.0018 | 0.09899 ±<br>0.0013 | 0.57693 ±<br>0.0065 | 0.14184 ±<br>0.0023 | 0.10019 ±<br>0.0014 | 0.03558 ±<br>0.0014 | 0.37234 ±<br>0.0104 | 1.00000 ±<br>0.0000 | 0.04496 ±<br>0.0012 | 0.02705 ±<br>0.0015 |                     |  |
| ZH<br>Franc<br>e | 0.49858 ±<br>0.0032 | 0.15600 ±<br>0.0035 | 0.24915 ±<br>0.0022 | 0.70848 ±<br>0.0057 | 0.28748 ±<br>0.0067 | 0.25371 ±<br>0.0019 | 0.14421 ±<br>0.0017 | 0.41815 ±<br>0.0090 | 1.00000 ±<br>0.0000 | 0.16910 ±<br>0.0021 | 0.12423 ±<br>0.0018 | 1.00000 ±<br>0.0000 |  |

746



Table S6: Rate of synonymous divergence Ks-JC, detected between different alleles for gene *cox* of *Wolbachia* infecting *C. parallelus*. SD: Standard deviation, calculated using the formula of the standard deviation of the ratio given by Neter *et al.* (1978) as proposed by Raychoudhury *et al.* (2009).

| Allele x | Allele y | Ks    | ±SD   | Divergence (years) | ±years    |
|----------|----------|-------|-------|--------------------|-----------|
| H1       | H2       | 0.365 | 0.053 | 40.588.889         | 5.872.561 |
| H1       | H3       | 0.363 | 0.053 | 40.377.778         | 5.854.403 |
| H1       | H4       | 0.037 | 0.021 | 4.111.111          | 2.302.144 |
| H1       | H5       | 0.365 | 0.053 | 40.588.889         | 5.872.561 |
| H1       | H6       | 0.346 | 0.052 | 38.433.333         | 5.801.173 |
| H2       | H3       | 0.190 | 0.043 | 21.133.333         | 4.776.953 |
| H2       | H4       | 0.385 | 0.053 | 42.788.889         | 5.934.819 |
| H2       | H5       | 0.012 | 0.012 | 1.344.444          | 1.333.422 |
| H2       | H6       | 0.012 | 0.012 | 1.344.444          | 1.333.422 |
| H3       | H4       | 0.383 | 0.053 | 42.566.667         | 5.917.255 |
| H3       | H5       | 0.175 | 0.042 | 19.433.333         | 4.623.863 |
| H3       | H6       | 0.175 | 0.042 | 19.433.333         | 4.623.863 |
| H4       | H5       | 0.385 | 0.053 | 42.788.889         | 5.934.819 |
| H4       | H6       | 0.365 | 0.053 | 40.588.889         | 5.872.561 |
| H5       | H6       | 0.025 | 0.017 | 2.722.222          | 1.885.450 |

Table S7: Rate of synonymous divergence Ks-JC, detected between different alleles for gene *fbpA* of *Wolbachia* infecting *C. parallelus*. SD: Standard deviation, calculated using the formula of the standard deviation of the ratio given by Neter *et al.* (1978) as proposed by Raychoudhury *et al.* (2009).

| Allele x | Allele y | Ks    | ±SD   | Divergence (years) | ±years    |
|----------|----------|-------|-------|--------------------|-----------|
| H1       | H2       | 0.659 | 0.047 | 73.177.778         | 5.199.701 |
| H1       | H2       | 0.040 | 0.019 | 4.444.444          | 2.147.990 |
| H1       | H3       | 0.681 | 0.046 | 75.622.222         | 5.108.707 |
| H1       | H5       | 0.030 | 0.017 | 3.311.111          | 1.863.101 |
| H2       | H2       | 0.661 | 0.047 | 73.455.556         | 5.196.782 |
| H2       | H3       | 0.010 | 0.010 | 1.088.889          | 1.081.110 |
| H2       | H5       | 0.660 | 0.047 | 73.366.667         | 5.197.733 |
| H2       | H3       | 0.683 | 0.046 | 75.922.222         | 5.103.356 |
| H2       | H5       | 0.072 | 0.025 | 7.944.444          | 2.826.638 |
| H3       | H5       | 0.682 | 0.046 | 75.822.222         | 5.104.997 |

Table S8: Rate of synonymous divergence Ks-JC, detected between different alleles for gene *gatB* of *Wolbachia* infecting *C. parallelus*. SD: Standard deviation, calculated using the formula of the standard deviation of the ratio given by Neter *et al.* (1978) as proposed by Raychoudhury *et al.* (2009).

| Allele x | Allele y | Ks    | ±SD   | Divergence (years) | ±years    |
|----------|----------|-------|-------|--------------------|-----------|
| H1       | H2       | 0.455 | 0.056 | 50.555.556         | 6.238.165 |
| H1       | H3       | 0.013 | 0.013 | 1.422.222          | 1.409.711 |
| H1       | H4       | 0.506 | 0.056 | 56.244.444         | 6.276.681 |
| H1       | H5       | 0.000 | 0.000 | 0                  | 0         |
| H2       | H3       | 0.432 | 0.056 | 48.000.000         | 6.205.388 |
| H2       | H4       | 0.026 | 0.018 | 2.877.778          | 1.991.931 |
| H2       | H5       | 0.455 | 0.056 | 50.555.556         | 6.238.165 |
| H3       | H4       | 0.482 | 0.056 | 53.500.000         | 6.272.865 |
| H3       | H5       | 0.013 | 0.013 | 1.422.222          | 1.409.711 |
| H4       | H5       | 0.506 | 0.056 | 56.244.444         | 6.276.681 |

Table S9: Rate of synonymous divergence Ks-JC, detected between different alleles for gene *ftsZ* of *Wolbachia* infecting *C. parallelus*. SD: Standard deviation, calculated using the formula of the standard deviation of the ratio given by Neter *et al.* (1978) as proposed by Raychoudhury *et al.* (2009).

| Allele x | Allele y | Ks    | ±SD   | Divergence (years) | ±years    |
|----------|----------|-------|-------|--------------------|-----------|
| H1       | H2       | 0.765 | 0.042 | 85.022.222         | 4.659.425 |
| H1       | H3       | 0.020 | 0.014 | 2.188.889          | 1.523.871 |
| H1       | H4       | 0.010 | 0.010 | 1.088.889          | 1.079.374 |
| H1       | H5       | 0.739 | 0.043 | 82.055.556         | 4.830.665 |
| H2       | H3       | 0.767 | 0.042 | 85.255.556         | 4.648.771 |
| H2       | H4       | 0.739 | 0.043 | 82.055.556         | 4.830.665 |
| H2       | H5       | 0.030 | 0.017 | 3.355.556          | 1.887.422 |
| H3       | H4       | 0.030 | 0.017 | 3.311.111          | 1.864.552 |
| H3       | H5       | 0.741 | 0.043 | 82.277.778         | 4.822.682 |
| H4       | H5       | 0.713 | 0.045 | 79.188.889         | 4.974.128 |

Table S10: Rate of synonymous divergence Ks-JC, detected between different alleles for gene *hcpA* of *Wolbachia* infecting *C. parallelus*. SD: Standard deviation, calculated using the formula of the standard deviation of the ratio given by Neter *et al.* (1978) as proposed by Raychoudhury *et al.* (2009).

| Allele x | Allele y | Ks    | ±SD   | Divergence (years) | ±years    |
|----------|----------|-------|-------|--------------------|-----------|
| H1       | H2       | 0.454 | 0.051 | 50.488.889         | 5.622.233 |
| H1       | H3       | 0.021 | 0.015 | 2.322.222          | 1.612.420 |
| H1       | H4       | 0.454 | 0.051 | 50.488.889         | 5.622.233 |
| H1       | H5       | 0.443 | 0.050 | 49.211.111         | 5.599.004 |
| H1       | H6       | 0.065 | 0.025 | 7.177.778          | 2.773.234 |

|    |     |        |       |            |           |
|----|-----|--------|-------|------------|-----------|
| H1 | H7  | 0.387  | 0.049 | 43.044.444 | 5.481.804 |
| H1 | H8  | 0.042  | 0.020 | 4.700.000  | 2.268.696 |
| H1 | H9  | 0.111  | 0.032 | 12.277.778 | 3.530.923 |
| H1 | H10 | 0.388  | 0.049 | 43.144.444 | 5.488.922 |
| H2 | H3  | 0.494  | 0.051 | 54.933.333 | 5.650.077 |
| H2 | H4  | 0.000  | 0.000 | 0          | 0         |
| H2 | H5  | 0.000  | 0.000 | 0          | 0         |
| H2 | H6  | 0.506  | 0.051 | 56.188.889 | 5.655.039 |
| H2 | H7  | 0.032  | 0.018 | 3.511.111  | 1.973.525 |
| H2 | H8  | 0.494  | 0.051 | 54.933.333 | 5.650.077 |
| H2 | H9  | 0.464  | 0.051 | 51.544.444 | 5.631.027 |
| H2 | H10 | 0.032  | 0.018 | 3.511.111  | 1.975.256 |
| H3 | H4  | 0.494  | 0.051 | 54.933.333 | 5.650.077 |
| H3 | H5  | 0.482  | 0.051 | 53.577.778 | 5.637.236 |
| H3 | H6  | 0.065  | 0.025 | 7.188.889  | 2.777.667 |
| H3 | H7  | 0.424  | 0.050 | 47.066.667 | 5.565.114 |
| H3 | H8  | 0.042  | 0.020 | 4.711.111  | 2.273.247 |
| H3 | H9  | 0.087  | 0.029 | 9.688.889  | 3.180.076 |
| H3 | H10 | 0.425  | 0.050 | 47.177.778 | 5.571.425 |
| H4 | H5  | 0.000  | 0.000 | 0          | 0         |
| H4 | H6  | 0.506  | 0.051 | 56.188.889 | 5.655.039 |
| H4 | H7  | 0.032  | 0.018 | 3.511.111  | 1.973.525 |
| H4 | H8  | 0.494  | 0.051 | 54.933.333 | 5.650.077 |
| H4 | H9  | 0.464  | 0.051 | 51.544.444 | 5.631.027 |
| H4 | H10 | 0.032  | 0.018 | 3.511.111  | 1.975.256 |
| H5 | H6  | 0.493  | 0.051 | 54.800.000 | 5.645.239 |
| H5 | H7  | 0.0315 | 0.018 | 3.500.000  | 1.967.158 |
| H5 | H8  | 0.482  | 0.051 | 53.577.778 | 5.637.236 |
| H5 | H9  | 0.452  | 0.050 | 50.244.444 | 5.610.062 |
| H5 | H10 | 0.032  | 0.018 | 3.500.000  | 1.968.777 |
| H6 | H7  | 0.434  | 0.050 | 48.188.889 | 5.586.109 |
| H6 | H8  | 0.021  | 0.015 | 2.322.222  | 1.615.248 |
| H6 | H9  | 0.042  | 0.020 | 4.711.111  | 2.273.247 |
| H6 | H10 | 0.435  | 0.050 | 48.300.000 | 5.592.499 |
| H7 | H8  | 0.424  | 0.050 | 47.066.667 | 5.565.114 |
| H7 | H9  | 0.396  | 0.050 | 44.011.111 | 5.503.515 |
| H7 | H10 | 0.000  | 0.000 | 0          | 0         |
| H8 | H9  | 0.064  | 0.025 | 7.155.556  | 2.766.811 |
| H8 | H10 | 0.425  | 0.050 | 47.177.778 | 5.571.425 |
| H9 | H10 | 0.397  | 0.050 | 44.100.000 | 5.510.225 |

778

Table S11: Synonymous divergence Ks-JC between the main ST belonging to supergroup F detected in both subspecies of *C. parallelus*. SD: Standard deviation, calculated using the formula of the standard deviation of the ratio given by Neter *et al.* (1978) as proposed by Raychoudhury *et al.* (2009).

| Allele x | Allele y | Ks     | ±SD   | Divergence (years) | ±years    |
|----------|----------|--------|-------|--------------------|-----------|
| ST10     | ST11     | 0.0109 | 0.005 | 1.211.111          | 535.687   |
| ST10     | ST24     | 0.0376 | 0.009 | 4.177.778          | 982.023   |
| ST10     | ST25     | 0.0241 | 0.007 | 2.677.778          | 791.342   |
| ST11     | ST24     | 0.0445 | 0.010 | 4.944.444          | 1 064.878 |
| ST11     | ST25     | 0.0308 | 0.008 | 3.422.222          | 891.855   |
| ST24     | ST25     | 0.0131 | 0.005 | 1.455.556          | 587.295   |

Table S12: synonymous divergence Ks-JC between the main ST belonging to supergroup B detected in both subspecies of *C. parallelus*. SD: Standard deviation, calculated using the formula of the standard deviation of the ratio given by Neter *et al.* (1978) as proposed by Raychoudhury *et al.* (2009).

| Allele x | Allele y | Ks    | ±SD   | Divergence (years) | ±years  |
|----------|----------|-------|-------|--------------------|---------|
| ST13     | ST31     | 0.014 | 0.006 | 1.566.667          | 633.171 |
| ST6      | ST31     | 0.012 | 0.005 | 1.311.111          | 579.907 |
| ST13     | ST33     | 0.012 | 0.005 | 1.311.111          | 580.524 |
| ST14     | ST31     | 0.012 | 0.005 | 1.311.111          | 579.907 |
| ST17     | ST31     | 0.012 | 0.005 | 1.311.111          | 579.677 |
| ST3      | ST31     | 0.009 | 0.005 | 1.044.444          | 518.213 |
| ST6      | ST33     | 0.009 | 0.005 | 1.044.444          | 518.764 |
| ST7      | ST31     | 0.009 | 0.005 | 1.044.444          | 518.007 |
| ST14     | ST33     | 0.009 | 0.005 | 1.044.444          | 518.764 |
| ST16     | ST31     | 0.009 | 0.005 | 1.044.444          | 518.007 |
| ST17     | ST33     | 0.009 | 0.005 | 1.044.444          | 518.564 |
| ST3      | ST33     | 0.007 | 0.004 | 788.889            | 451.377 |
| ST7      | ST33     | 0.007 | 0.004 | 788.889            | 451.202 |
| ST13     | ST32     | 0.007 | 0.004 | 788.889            | 451.292 |
| ST16     | ST33     | 0.007 | 0.004 | 788.889            | 451.202 |
| ST6      | ST16     | 0.007 | 0.004 | 777.778            | 447.947 |
| ST32     | ST31     | 0.007 | 0.004 | 777.778            | 447.733 |
| ST3      | ST13     | 0.005 | 0.003 | 522.222            | 367.622 |
| ST3      | ST16     | 0.005 | 0.003 | 522.222            | 367.476 |
| ST6      | ST14     | 0.005 | 0.003 | 522.222            | 367.622 |
| ST6      | ST17     | 0.005 | 0.003 | 522.222            | 367.476 |
| ST6      | ST32     | 0.005 | 0.003 | 522.222            | 367.622 |
| ST7      | ST13     | 0.005 | 0.003 | 522.222            | 367.476 |
| ST7      | ST16     | 0.005 | 0.003 | 522.222            | 367.334 |
| ST13     | ST16     | 0.005 | 0.003 | 522.222            | 367.476 |
| ST14     | ST32     | 0.005 | 0.003 | 522.222            | 367.622 |
| ST17     | ST32     | 0.005 | 0.003 | 522.222            | 367.476 |
| ST32     | ST33     | 0.005 | 0.003 | 522.222            | 367.691 |
| ST3      | ST6      | 0.002 | 0.002 | 255.556            | 257.478 |
| ST3      | ST14     | 0.002 | 0.002 | 255.556            | 257.478 |

|      |      |       |       |         |         |
|------|------|-------|-------|---------|---------|
| ST3  | ST17 | 0.002 | 0.002 | 255.556 | 257.375 |
| ST3  | ST32 | 0.002 | 0.002 | 255.556 | 257.478 |
| ST6  | ST7  | 0.002 | 0.002 | 255.556 | 257.375 |
| ST6  | ST13 | 0.002 | 0.002 | 255.556 | 257.478 |
| ST7  | ST14 | 0.002 | 0.002 | 255.556 | 257.375 |
| ST7  | ST17 | 0.002 | 0.002 | 255.556 | 257.276 |
| ST7  | ST32 | 0.002 | 0.002 | 255.556 | 257.375 |
| ST13 | ST14 | 0.002 | 0.002 | 255.556 | 257.478 |
| ST13 | ST17 | 0.002 | 0.002 | 255.556 | 257.375 |
| ST14 | ST16 | 0.002 | 0.002 | 255.556 | 257.375 |
| ST16 | ST17 | 0.002 | 0.002 | 255.556 | 257.276 |
| ST16 | ST32 | 0.002 | 0.002 | 255.556 | 257.375 |
| ST33 | ST31 | 0.002 | 0.002 | 255.556 | 257.300 |
| ST3  | ST7  | 0.000 | 0.000 | 0       | 0       |
| ST14 | ST17 | 0.000 | 0.000 | 0       | 0       |

791

792

Table s13: Alleles includes in phylogenetic analysis of gatB

|          |          |          |          |          |          |          |
|----------|----------|----------|----------|----------|----------|----------|
| gatB_1   | gatB_21  | gatB_121 | gatB_31  | gatB_97  | gatB_23  | gatB_66  |
| gatB_2   | gatB_38  | gatB_122 | gatB_30  | gatB_129 | gatB_36  | gatB_72  |
| gatB_62  | gatB_39  | gatB_126 | gatB_73  | gatB_131 | gatB_32  | gatB_128 |
| gatB_68  | gatB_40  | gatB_127 | gatB_65  | gatB_141 | gatB_49  | gatB_99  |
| gatB_88  | gatB_48  | gatB_132 | gatB_82  | gatB_142 | gatB_53  | gatB_130 |
| gatB_89  | gatB_55  | gatB_134 | gatB_113 | gatB_143 | gatB_56  | gatB_138 |
| gatB_3   | gatB_69  | gatB_139 | gatB_112 | gatB_18  | gatB_76  | gatB_157 |
| gatB_4   | gatB_70  | gatB_140 | gatB_115 | gatB_46  | gatB_94  | gatB_22  |
| gatB_83  | gatB_71  | gatB_145 | gatB_116 | gatB_133 | gatB_98  |          |
| gatB_101 | gatB_125 | gatB_147 | gatB_117 | gatB_90  | gatB_123 |          |
| gatB_135 | gatB_79  | gatB_149 | gatB_118 | gatB_33  | gatB_37  |          |
| gatB_137 | gatB_80  | gatB_150 | gatB_81  | gatB_34  | gatB_78  |          |
| gatB_152 | gatB_91  | gatB_151 | gatB_110 | gatB_124 | gatB_93  |          |
| gatB_96  | gatB_100 | gatB_153 | gatB_111 | gatB_19  | gatB_42  |          |
| gatB_148 | gatB_102 | gatB_155 | gatB_28  | gatB_20  | gatB_43  |          |
| gatB_5   | gatB_154 | gatB_158 | gatB_64  | gatB_24  | gatB_75  |          |
| gatB_6   | gatB_103 | gatB_15  | gatB_7   | gatB_27  | gatB_45  |          |
| gatB_17  | gatB_104 | gatB_156 | gatB_47  | gatB_41  | gatB_54  |          |
| gatB_25  | gatB_105 | gatB_59  | gatB_67  | gatB_74  | gatB_87  |          |
| gatB_136 | gatB_106 | gatB_95  | gatB_85  | gatB_35  | gatB_57  |          |
| gatB_108 | gatB_107 | gatB_144 | gatB_86  | gatB_51  | gatB_58  |          |
| gatB_9   | gatB_146 | gatB_92  | gatB_8   | gatB_52  | gatB_60  |          |
| gatB_12  | gatB_109 | gatB_26  | gatB_10  | gatB_44  | gatB_61  |          |
| gatB_13  | gatB_119 | gatB_114 | gatB_11  | gatB_50  | gatB_63  |          |
| gatB_16  | gatB_120 | gatB_29  | gatB_14  | gatB_77  | gatB_84  |          |

793

794

795

Table s14: Alleles includes in phylogenetic analysis of coxA

796

|        |          |          |         |          |         |
|--------|----------|----------|---------|----------|---------|
| coxA_1 | coxA_105 | coxA_131 | coxA_87 | coxA_129 | coxA_32 |
|--------|----------|----------|---------|----------|---------|

|          |          |          |          |          |          |
|----------|----------|----------|----------|----------|----------|
| coxA_6   | coxA_106 | coxA_83  | coxA_91  | coxA_2   | coxA_61  |
| coxA_17  | coxA_122 | coxA_13  | coxA_112 | coxA_60  | coxA_10  |
| coxA_23  | coxA_123 | coxA_5   | coxA_27  | coxA_70  | coxA_37  |
| coxA_103 | coxA_126 | coxA_88  | coxA_69  | coxA_110 | coxA_58  |
| coxA_111 | coxA_133 | coxA_96  | coxA_94  | coxA_20  | coxA_130 |
| coxA_113 | coxA_139 | coxA_25  | coxA_82  | coxA_24  | coxA_84  |
| coxA_116 | coxA_9   | coxA_11  | coxA_95  | coxA_28  | coxA_50  |
| coxA_117 | coxA_80  | coxA_38  | coxA_97  | coxA_35  | coxA_53  |
| coxA_118 | coxA_22  | coxA_79  | coxA_92  | coxA_45  | coxA_77  |
| coxA_124 | coxA_78  | coxA_121 | coxA_93  | coxA_46  | coxA_44  |
| coxA_143 | coxA_68  | coxA_135 | coxA_30  | coxA_40  | coxA_48  |
| coxA_140 | coxA_16  | coxA_136 | coxA_31  | coxA_41  | coxA_49  |
| coxA_141 | coxA_119 | coxA_144 | coxA_55  | coxA_21  | coxA_52  |
| coxA_3   | coxA_137 | coxA_138 | coxA_56  | coxA_108 | coxA_59  |
| coxA_8   | coxA_64  | coxA_43  | coxA_63  | coxA_109 | coxA_72  |
| coxA_114 | coxA_73  | coxA_67  | coxA_89  | coxA_33  | coxA_104 |
| coxA_12  | coxA_132 | coxA_120 | coxA_90  | coxA_34  | coxA_57  |
| coxA_14  | coxA_134 | coxA_98  | coxA_29  | coxA_39  | coxA_62  |
| coxA_18  | coxA_26  | coxA_99  | coxA_54  | coxA_74  |          |
| coxA_36  | coxA_107 | coxA_100 | coxA_15  | coxA_47  |          |
| coxA_51  | coxA_65  | coxA_101 | coxA_42  | coxA_75  |          |
| coxA_81  | coxA_66  | coxA_102 | coxA_76  | coxA_142 |          |
| coxA_115 | coxA_125 | coxA_71  | coxA_127 | coxA_7   |          |
| coxA_85  | coxA_4   | coxA_86  | coxA_128 | coxA_19  |          |

Table s15: Alleles includes in phylogenetic analysis of fbpA

|          |          |          |          |
|----------|----------|----------|----------|
| fbpA_1   | fbpA_192 | fbpA_112 | fbpA_147 |
| fbpA_2   | fbpA_205 | fbpA_98  | fbpA_186 |
| fbpA_92  | fbpA_150 | fbpA_113 | fbpA_199 |
| fbpA_10  | fbpA_157 | fbpA_116 | fbpA_220 |
| fbpA_21  | fbpA_16  | fbpA_117 | fbpA_121 |
| fbpA_142 | fbpA_195 | fbpA_123 |          |
| fbpA_6   | fbpA_201 | fbpA_65  |          |
| fbpA_91  | fbpA_219 | fbpA_15  |          |
| fbpA_137 | fbpA_41  | fbpA_58  |          |
| fbpA_181 | fbpA_125 | fbpA_66  |          |
| fbpA_185 | fbpA_129 | fbpA_79  |          |
| fbpA_141 | fbpA_145 | fbpA_61  |          |
| fbpA_143 | fbpA_169 | fbpA_154 |          |
| fbpA_155 | fbpA_70  | fbpA_163 |          |
| fbpA_214 | fbpA_73  | fbpA_179 |          |
| fbpA_4   | fbpA_57  | fbpA_19  |          |
| fbpA_43  | fbpA_101 | fbpA_36  |          |

|          |          |          |
|----------|----------|----------|
| fbpA_75  | fbpA_103 | fbpA_47  |
| fbpA_76  | fbpA_106 | fbpA_52  |
| fbpA_176 | fbpA_107 | fbpA_54  |
| fbpA_25  | fbpA_50  | fbpA_85  |
| fbpA_95  | fbpA_140 | fbpA_96  |
| fbpA_162 | fbpA_86  | fbpA_8   |
| fbpA_207 | fbpA_108 | fbpA_83  |
| fbpA_132 | fbpA_110 | fbpA_119 |

Table s16: Alleles includes in phylogenetic analysis of ftsZ

|         |          |          |          |          |
|---------|----------|----------|----------|----------|
| ftsZ_1  | ftsZ_98  | ftsZ_22  | ftsZ_66  | ftsZ_33  |
| ftsZ_3  | ftsZ_99  | ftsZ_106 | ftsZ_63  | ftsZ_58  |
| ftsZ_5  | ftsZ_100 | ftsZ_108 | ftsZ_36  | ftsZ_14  |
| ftsZ_6  | ftsZ_103 | ftsZ_110 | ftsZ_41  | ftsZ_50  |
| ftsZ_10 | ftsZ_104 | ftsZ_109 | ftsZ_65  | ftsZ_13  |
| ftsZ_17 | ftsZ_116 | ftsZ_111 | ftsZ_73  | ftsZ_56  |
| ftsZ_29 | ftsZ_51  | ftsZ_4   | ftsZ_80  | ftsZ_74  |
| ftsZ_32 | ftsZ_53  | ftsZ_7   | ftsZ_78  | ftsZ_113 |
| ftsZ_34 | ftsZ_54  | ftsZ_8   | ftsZ_81  | ftsZ_114 |
| ftsZ_38 | ftsZ_24  | ftsZ_77  | ftsZ_89  | ftsZ_115 |
| ftsZ_39 | ftsZ_85  | ftsZ_107 | ftsZ_90  | ftsZ_79  |
| ftsZ_40 | ftsZ_27  | ftsZ_9   | ftsZ_94  | ftsZ_92  |
| ftsZ_42 | ftsZ_59  | ftsZ_11  | ftsZ_97  | ftsZ_93  |
| ftsZ_43 | ftsZ_28  | ftsZ_12  | ftsZ_95  | ftsZ_30  |
| ftsZ_44 | ftsZ_48  | ftsZ_96  | ftsZ_101 | ftsZ_31  |
| ftsZ_45 | ftsZ_60  | ftsZ_15  | ftsZ_105 | ftsZ_75  |
| ftsZ_47 | ftsZ_84  | ftsZ_62  | ftsZ_117 | ftsZ_76  |
| ftsZ_49 | ftsZ_68  | ftsZ_102 | ftsZ_19  |          |
| ftsZ_52 | ftsZ_61  | ftsZ_112 | ftsZ_91  |          |
| ftsZ_55 | ftsZ_86  | ftsZ_69  | ftsZ_16  |          |
| ftsZ_57 | ftsZ_88  | ftsZ_35  | ftsZ_21  |          |
| ftsZ_64 | ftsZ_87  | ftsZ_71  | ftsZ_67  |          |
| ftsZ_70 | ftsZ_26  | ftsZ_18  | ftsZ_37  |          |
| ftsZ_72 | ftsZ_83  | ftsZ_20  | ftsZ_25  |          |
| ftsZ_82 | ftsZ_2   | ftsZ_23  | ftsZ_46  |          |

Table s17: Alleles includes in phylogenetic analysis of hcpA

|          |         |         |          |          |          |          |
|----------|---------|---------|----------|----------|----------|----------|
| hcpA_106 | hcpA_49 | hcpA_69 | hcpA_76  | hcpA_114 | hcpA_119 | hcpA_153 |
| hcpA_130 | hcpA_46 | hcpA_96 | hcpA_134 | hcpA_115 | hcpA_164 | hcpA_158 |
| hcpA_144 | hcpA_54 | hcpA_61 | hcpA_18  | hcpA_116 | hcpA_136 | hcpA_157 |
| hcpA_13  | hcpA_45 | hcpA_64 | hcpA_131 | hcpA_112 | hcpA_151 | hcpA_160 |

|          |          |          |          |          |          |          |
|----------|----------|----------|----------|----------|----------|----------|
| hcpA_135 | hcpA_78  | hcpA_24  | hcpA_95  | hcpA_73  | hcpA_152 | hcpA_156 |
| hcpA_12  | hcpA_28  | hcpA_63  | hcpA_60  | hcpA_117 | hcpA_146 | hcpA_159 |
| hcpA_150 | hcpA_133 | hcpA_59  | hcpA_16  | hcpA_107 | hcpA_102 | hcpA_140 |
| hcpA_166 | hcpA_97  | hcpA_92  | hcpA_23  | hcpA_108 | hcpA_99  | hcpA_155 |
| hcpA_165 | hcpA_75  | hcpA_149 | hcpA_83  | hcpA_14  | hcpA_154 | hcpA_74  |
| hcpA_137 | hcpA_26  | hcpA_37  | hcpA_47  | hcpA_124 | hcpA_161 | hcpA_5   |
| hcpA_138 | hcpA_86  | hcpA_65  | hcpA_82  | hcpA_121 | hcpA_9   | hcpA_4   |
| hcpA_1   | hcpA_167 | hcpA_11  | hcpA_127 | hcpA_120 | hcpA_91  | hcpA_15  |
| hcpA_27  | hcpA_2   | hcpA_128 | hcpA_21  | hcpA_122 | hcpA_104 | hcpA_10  |
| hcpA_68  | hcpA_51  | hcpA_62  | hcpA_71  | hcpA_101 | hcpA_148 | hcpA_142 |
| hcpA_103 | hcpA_98  | hcpA_89  | hcpA_33  | hcpA_147 | hcpA_145 | hcpA_141 |
| hcpA_8   | hcpA_39  | hcpA_90  | hcpA_36  | hcpA_168 | hcpA_52  | hcpA_30  |
| hcpA_43  | hcpA_38  | hcpA_41  | hcpA_34  | hcpA_29  | hcpA_126 | hcpA_113 |
| hcpA_32  | hcpA_42  | hcpA_93  | hcpA_58  | hcpA_20  | hcpA_25  | hcpA_87  |
| hcpA_56  | hcpA_94  | hcpA_84  | hcpA_35  | hcpA_132 | hcpA_100 |          |
| hcpA_57  | hcpA_81  | hcpA_50  | hcpA_72  | hcpA_88  | hcpA_125 |          |
| hcpA_55  | hcpA_105 | hcpA_85  | hcpA_77  | hcpA_109 | hcpA_6   |          |
| hcpA_48  | hcpA_53  | hcpA_67  | hcpA_110 | hcpA_3   | hcpA_17  |          |
| hcpA_129 | hcpA_44  | hcpA_70  | hcpA_111 | hcpA_163 | hcpA_143 |          |
| hcpA_79  | hcpA_123 | hcpA_7   | hcpA_31  | hcpA_19  | hcpA_139 |          |
| hcpA_22  | hcpA_66  | hcpA_80  | hcpA_118 | hcpA_40  | hcpA_162 |          |

Table s18: Alleles includes in phylogenetic analysis of wsp

|         |         |         |
|---------|---------|---------|
| wsp_111 | wsp_6   | wsp_49  |
| wsp_31  | wsp_10  | wsp_40  |
| wsp_127 | wsp_26  | wsp_115 |
| wsp_5   | wsp_25  | wsp_117 |
| wsp_128 | wsp_7   | wsp_118 |
| wsp_9   | wsp_35  | wsp_120 |
| wsp_11  | wsp_36  | wsp_119 |
| wsp_22  | wsp_37  | wsp_122 |
| wsp_130 | wsp_74  | wsp_124 |
| wsp_14  | wsp_75  | wsp_151 |
| wsp_4   | wsp_76  | wsp_154 |
| wsp_1   | wsp_77  | wsp_157 |
| wsp_18  | wsp_79  | wsp_158 |
| wsp_21  | wsp_80  | wsp_101 |
| wsp_23  | wsp_113 | wsp_43  |
| wsp_33  | wsp_38  | wsp_41  |
| wsp_8   | wsp_87  | wsp_39  |
| wsp_29  | wsp_85  | wsp_45  |
| wsp_27  | wsp_90  | wsp_44  |
| wsp_28  | wsp_84  | wsp_83  |



|        |         |
|--------|---------|
| wsp_2  | wsp_103 |
| wsp_3  | wsp_89  |
| wsp_20 | wsp_106 |
| wsp_30 | wsp_46  |
| wsp_15 | wsp_48  |

# 813 Supplemental figures:

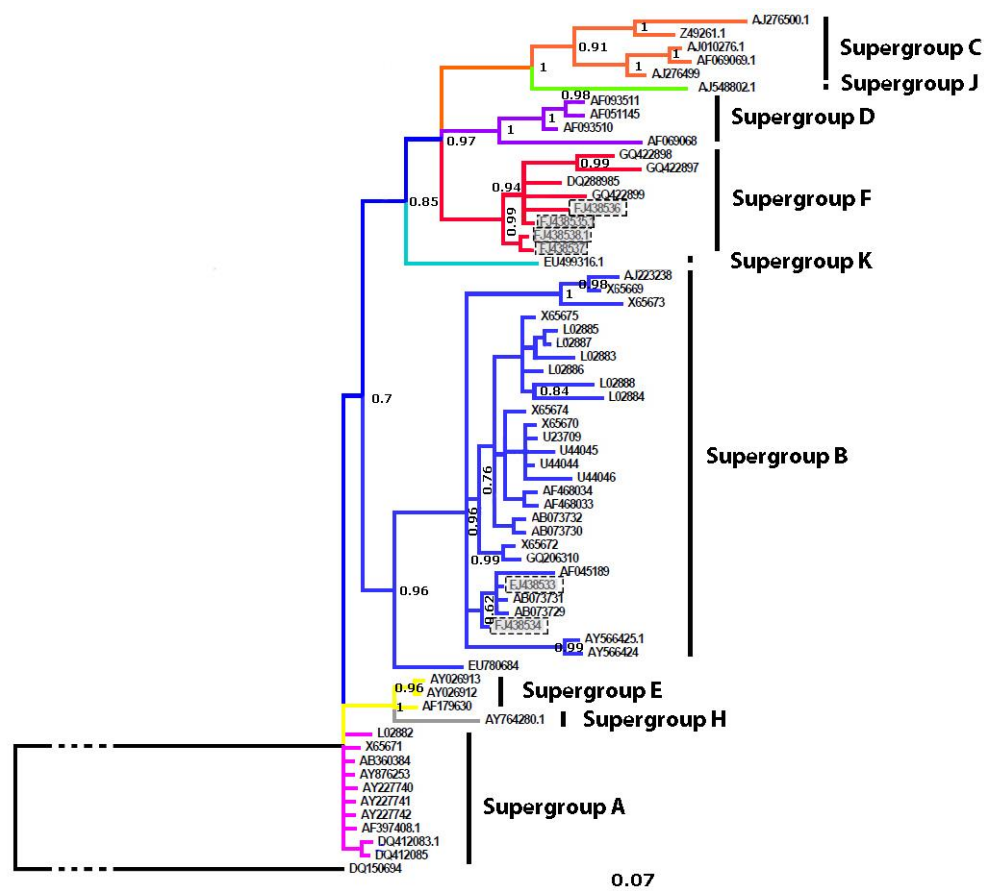

Fig. S1: (Online colour figure) Bayesian phylogenetic tree based on 16S rRNA gene. Outgroup: *E. coli*.

*Wolbachia* infection in *C. parallelus* is shaded is framed grey.

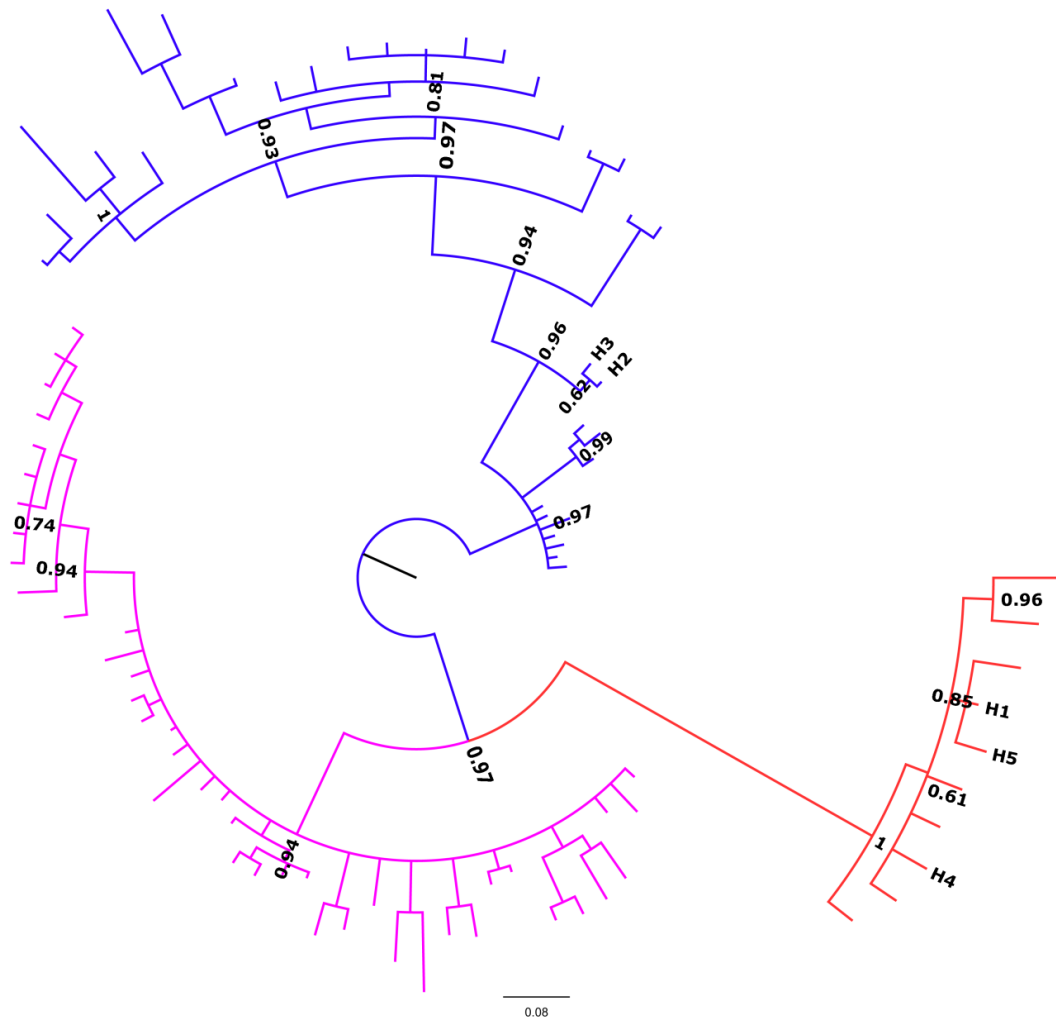

Fig. S2: Unrooted phylogenetic tree of *fbpA*, obtained by Bayesian inference. Alleles described in *C. parallelus* appear named H1 to H5. Posterior probabilities are shown in the nodes. The color code encodes the supergroup A (pink), B (blue), D (green), F (red) and H (purple). Posterior probabilities are shown in the nodes.

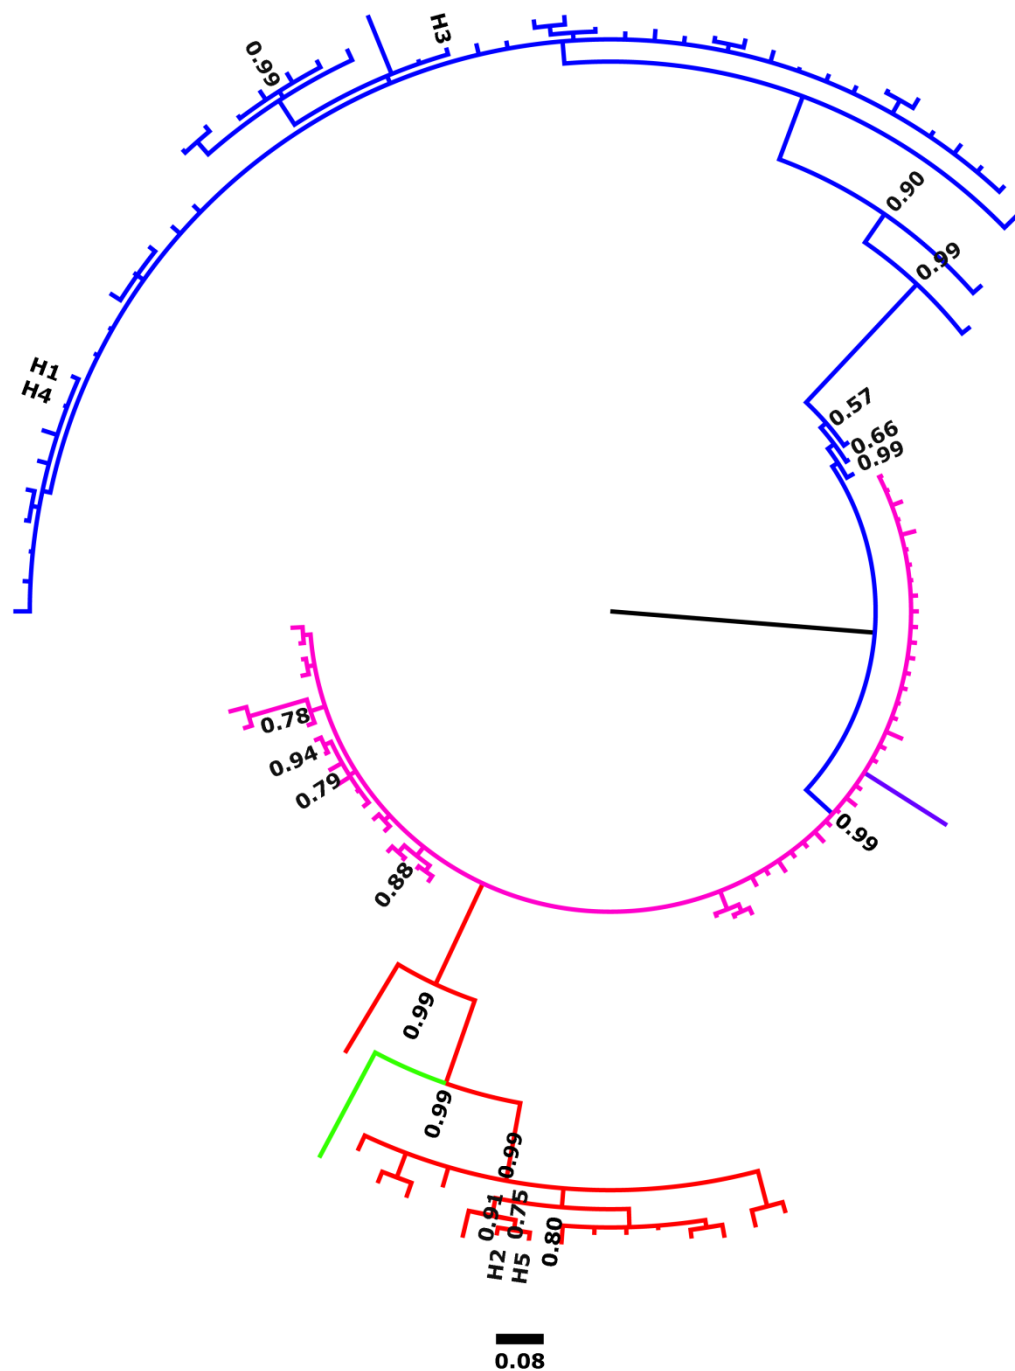

823 Fig. S3: Unrooted phylogenetic tree of *ftsZ*, obtained by Bayesian inference. Alleles described in *C. parallelus* appear  
824 named H1 to H5. Posterior probabilities are shown in the nodes. The color code encodes the supergroup A (pink), B  
825 (blue), D (green), F (red) and H (purple). Posterior probabilities are shown in the nodes.  
826  
827

828

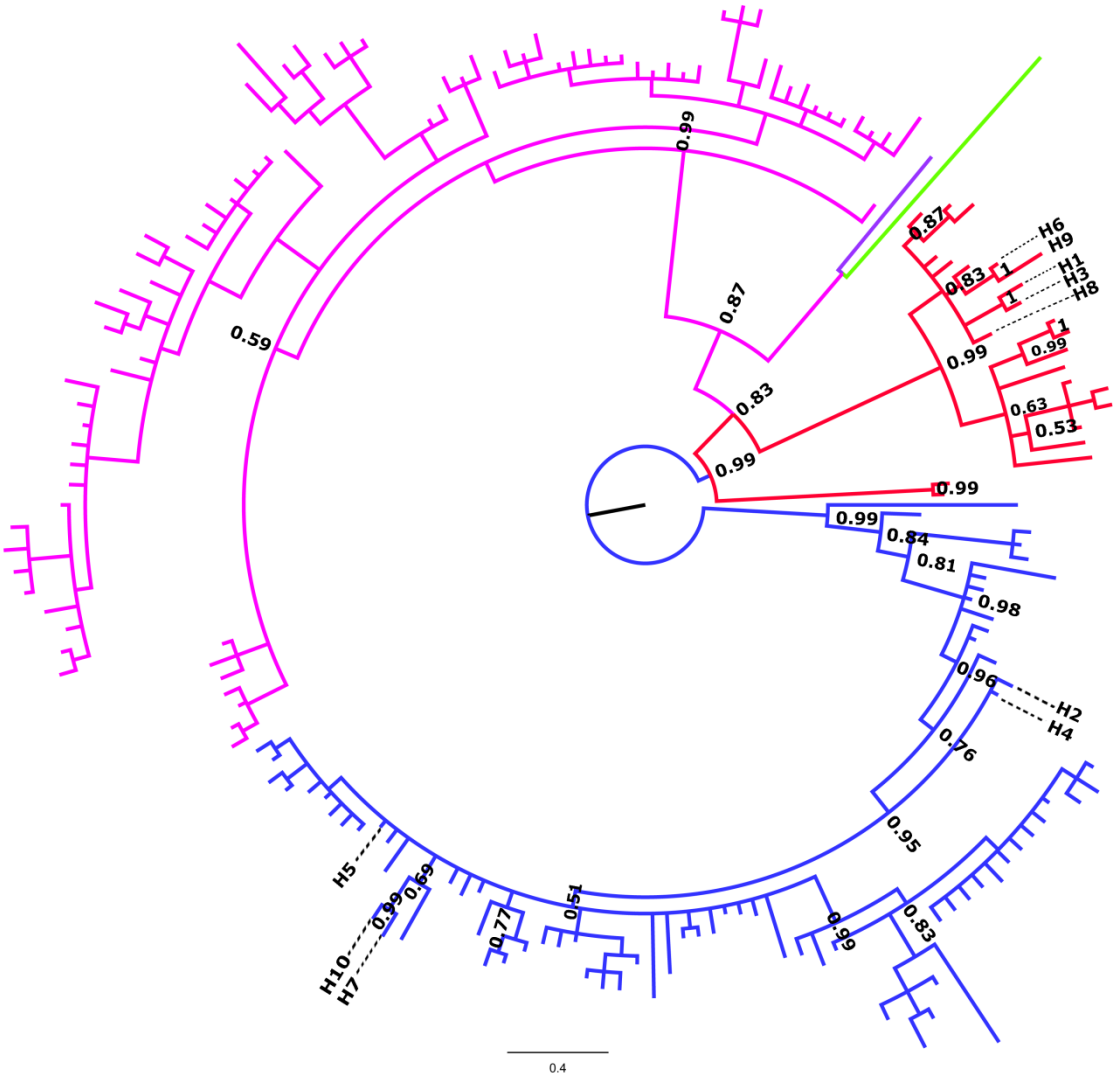

829

830

831

832

833

834

Fig. S4: Unrooted phylogenetic tree of *hcpA*, obtained by Bayesian inference. Alleles described in *C. parallelus* appear named H1 to H10. Posterior probabilities are shown in the nodes. The color code encodes the supergroup A (pink), B (blue), D (green), F (red) and H (purple). Posterior probabilities are shown in the nodes.

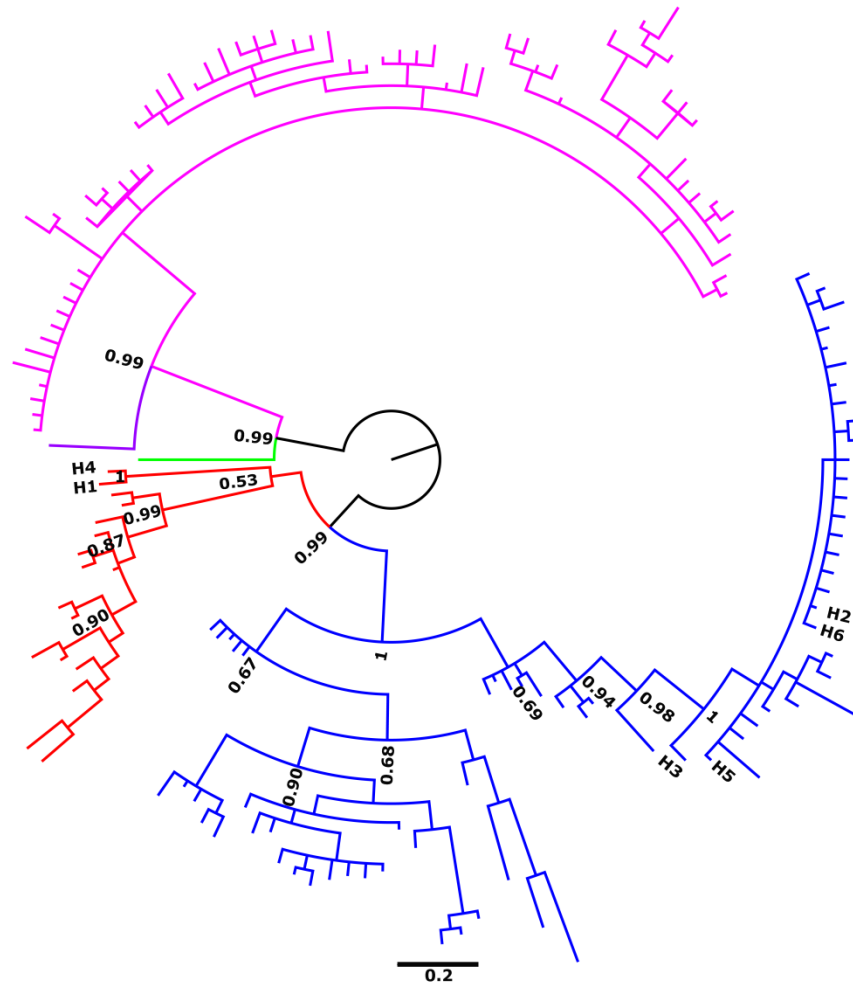

Fig. S5: Unrooted phylogenetic tree of *coxA*, obtained by Bayesian inference. Alleles described in *C. parallelus* appear named H1 to H6. Posterior probabilities are shown in the nodes. The color code encodes the supergroup A (pink), B (blue), D (green), F (red) and H (purple). Posterior probabilities are shown in the nodes.

843

844

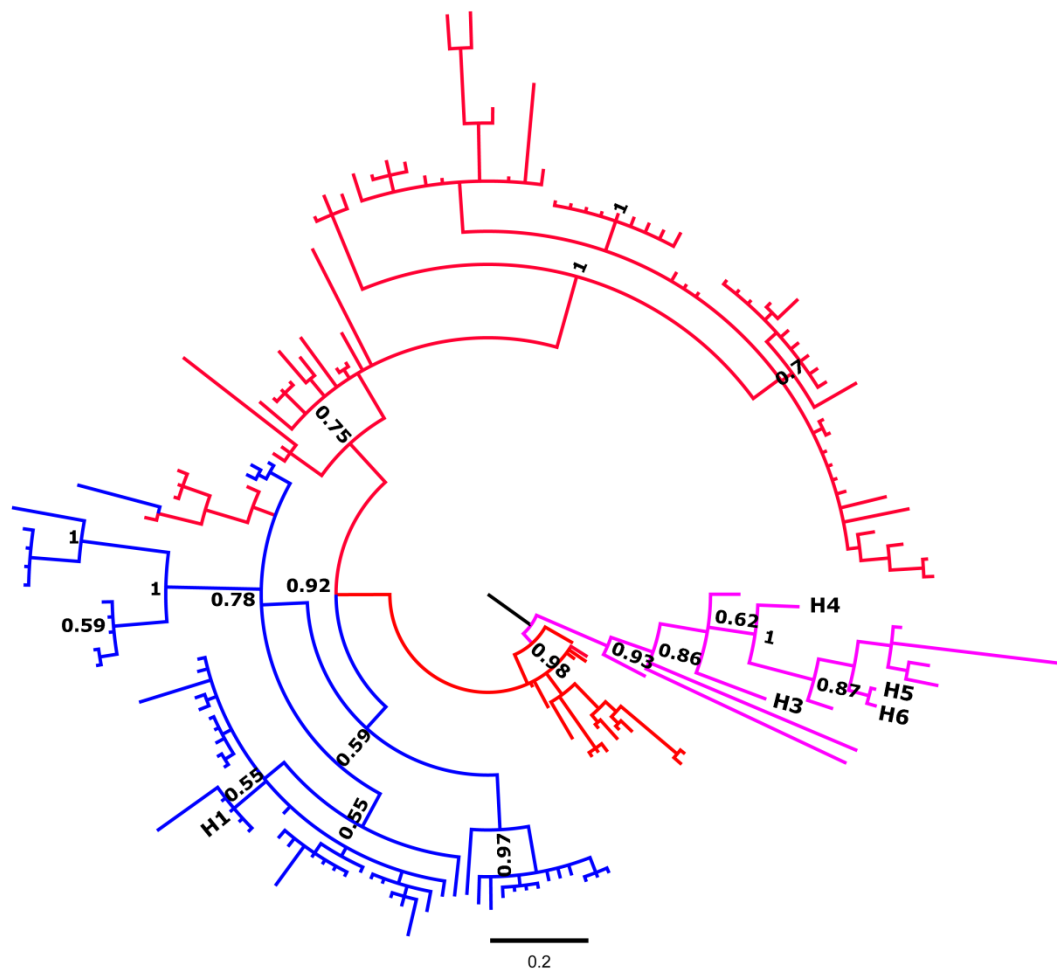

845

846

847

848

Fig. S6: Unrooted phylogenetic tree of *wsp*, obtained by Bayesian inference. Alleles described in *C. parallelus* appear named H1 to H16. Posterior probabilities are shown in the nodes. The color code encodes the supergroup A (pink), B (blue), D (green), F (red) and H (purple). Posterior probabilities are shown in the nodes.

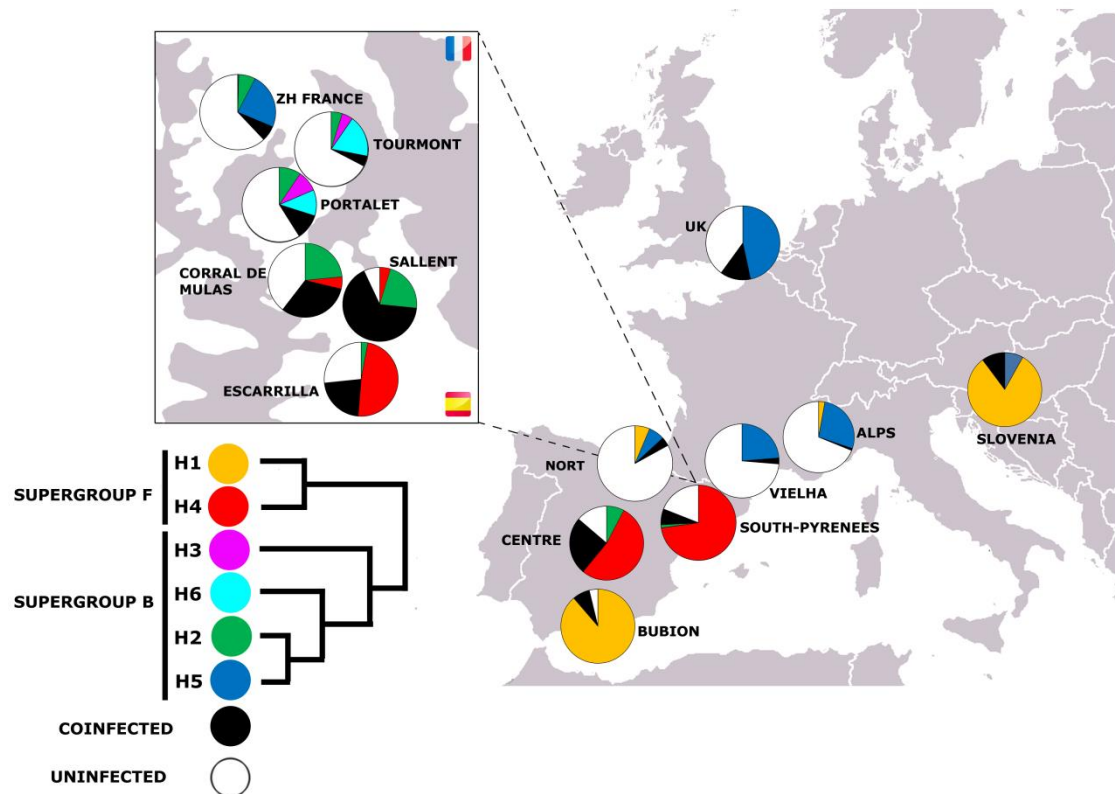

Fig S7: Geographical distribution of alleles detected for gene *coxA*

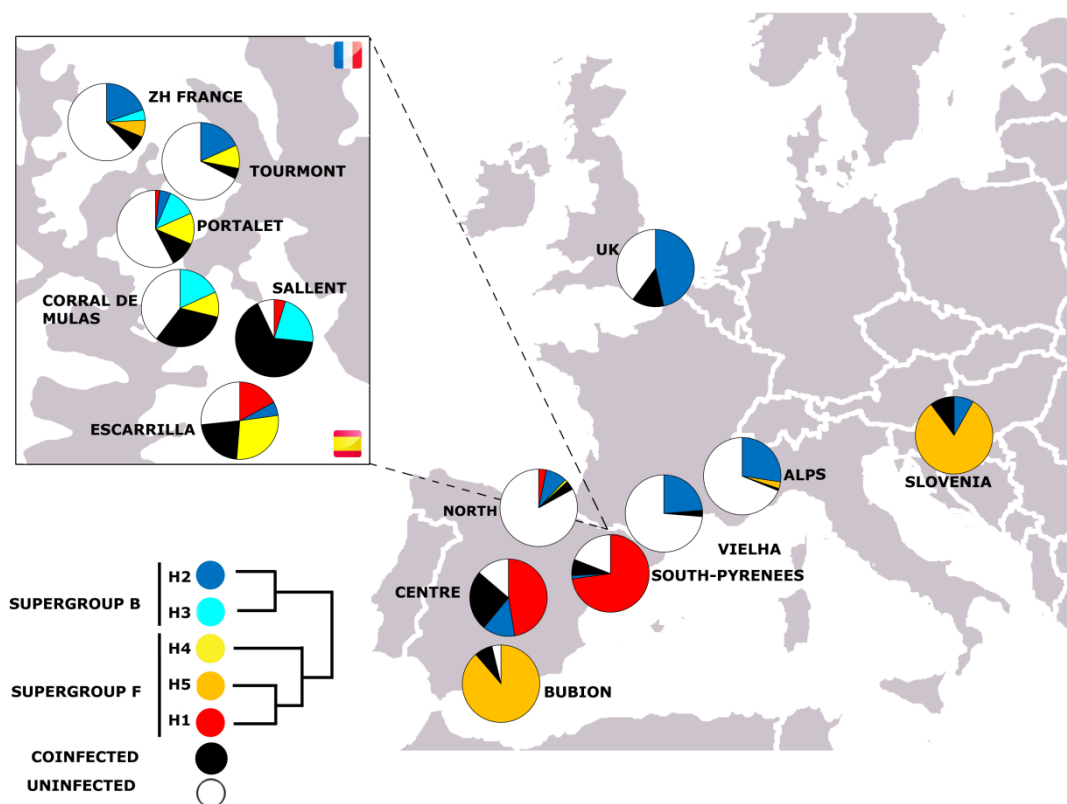

Fig S8: Geographical distribution of alleles detected for gene *fbpA*



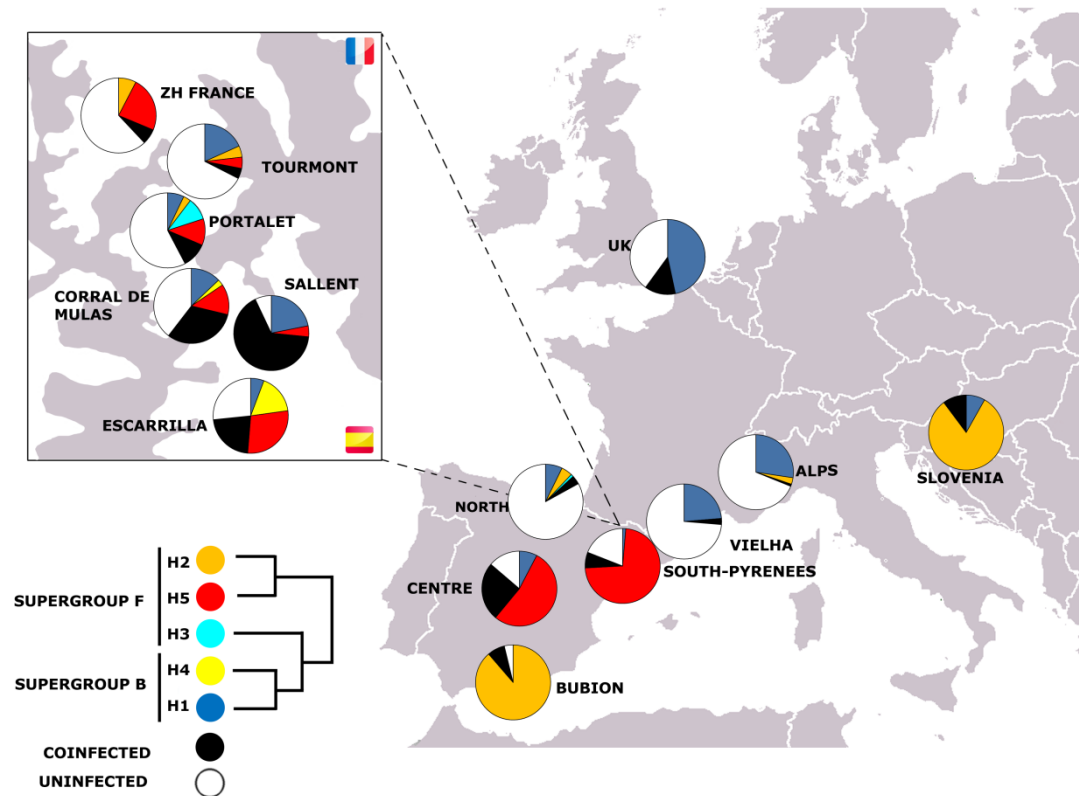

Fig S9: Geographical distribution of alleles detected for gene *ftsZ*

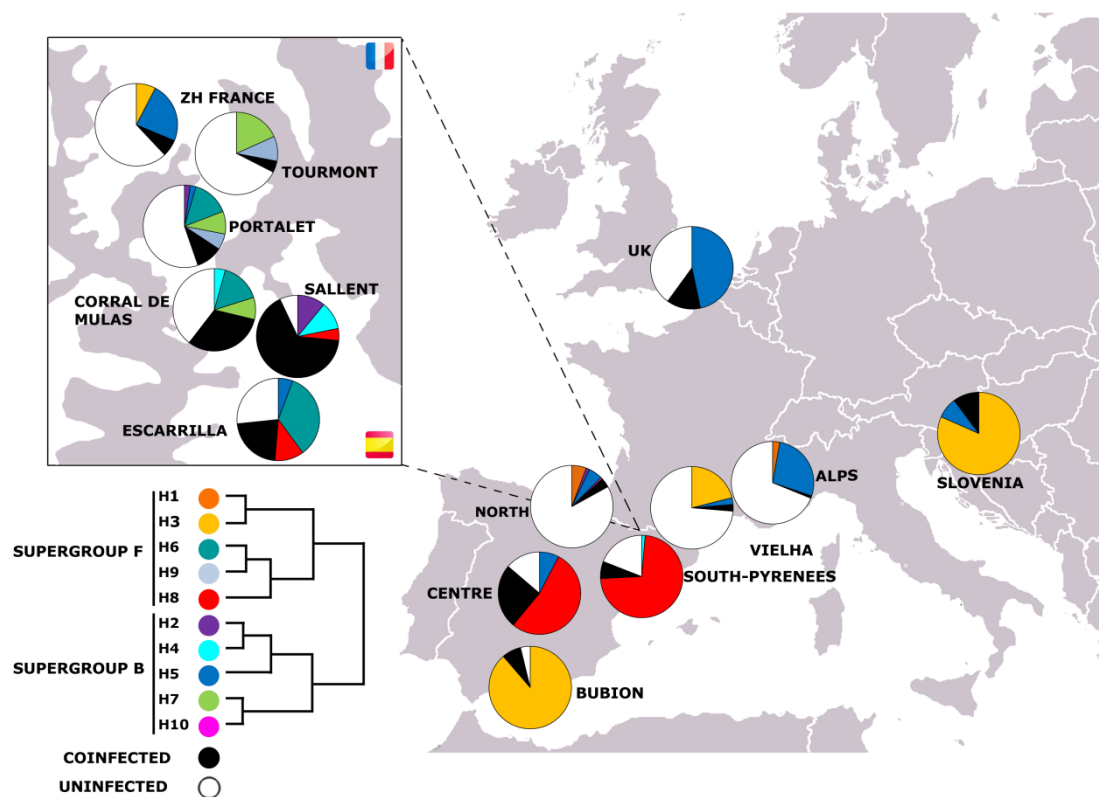

Fig S10: Geographical distribution of alleles detected for gene *hcpA*

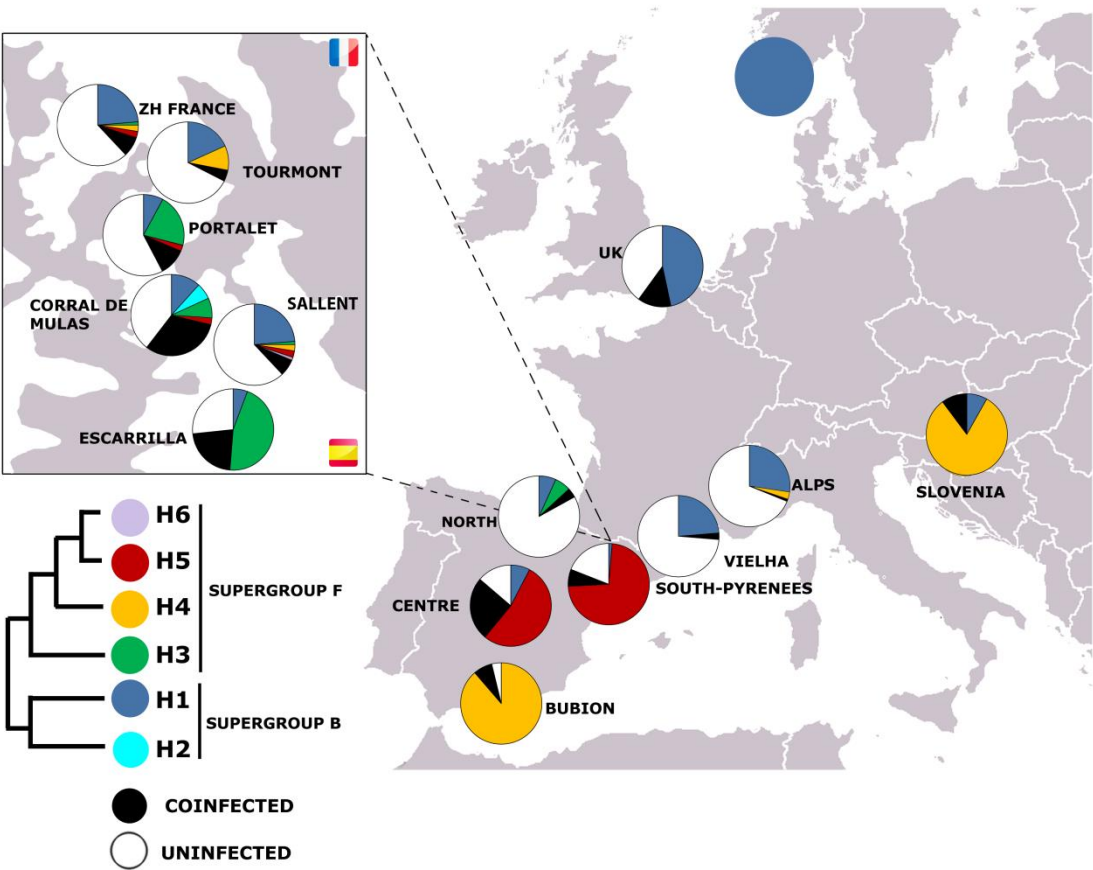

Fig S11: Geographical distribution of alleles detected for gene *wsp*

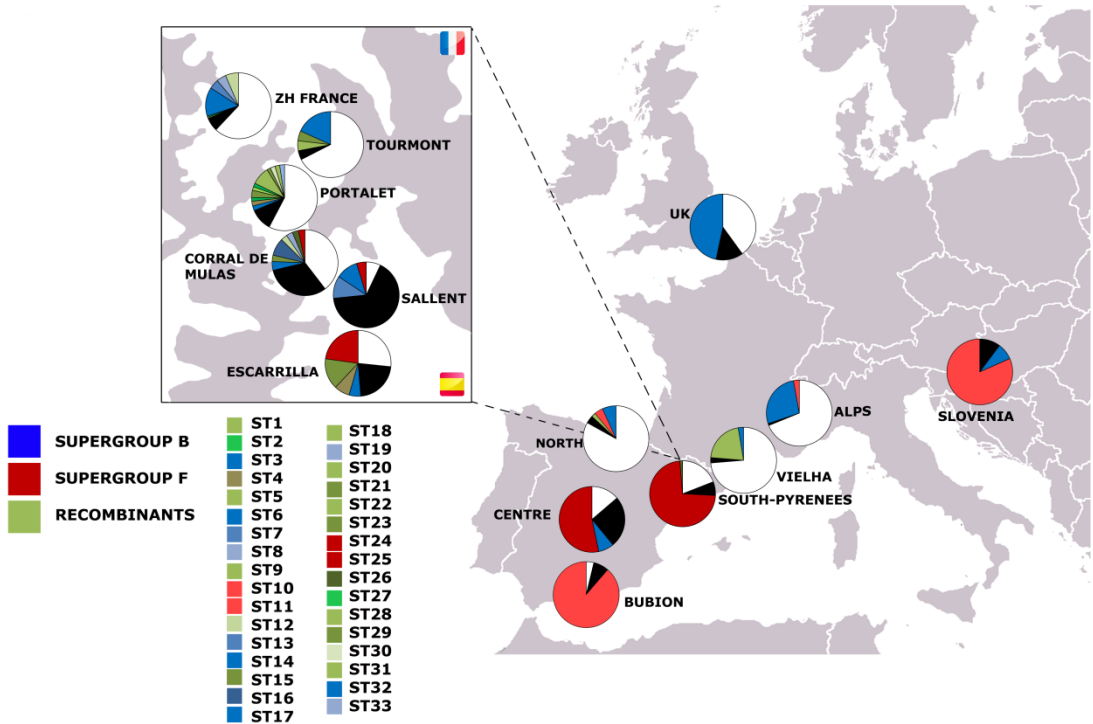

Fig S12: Geographical distribution of ST.

## 863 Supplemental references.

- 864 Fu Y, Li W (1993) Statistical tests of neutrality of mutations. *Genetics* **133**, 693-709.
- 865 Nei M (1987) *Molecular Evolutionary Genetics*. Columbia Univ. Press, NY.
- 866 Neter J, Wasserman W, Whitmore GA (1978) *Applied statistics*. Allyn and Bacon. Boston, MA.
- 867 Rousset F, Vautrin D, Solinag M (1992) Molecular identification of *Wolbachia*, the agent of  
868 cytoplasmic incompatibility in *Drosophila simulans*, and variability in relation with host  
869 mitochondrial types. *Proceedings of the Royal Society of London Series B-biological*  
870 *Sciences* **247**, 163-168.
- 871 Tajima F (1989) Statistical method for testing the neutral mutation hypothesis by DNA  
872 polymorphism. *Genetics* **123**, 585-595.
- 873 Watterson GA (1975) On the number of segregating sites in genetical models without  
874 recombination. *Theoretical Population Biology* **7**, 256–276,
